1 Extracellular peptidases in subsurface sediments of the White Oak River estuary, NC,  
2 suggest microbial community adaptation to oxidize degraded organic matter

3

4

5

6 Andrew D. Steen<sup>1,\*</sup>, Richard T. Kevorkian<sup>2</sup>, Jordan T. Bird<sup>2</sup>, Nina Dombrowski<sup>3</sup>,  
7 Brett J. Baker<sup>3</sup>, Shane M. Hagen<sup>1,6</sup>, Katherine H. Mulligan<sup>1,4,7</sup>, Jenna M. Schmidt<sup>1</sup>,  
8 Austen T. Webber<sup>1,8</sup>, Marc J. Alperin<sup>5</sup>

9

10

11

12

13 <sup>1</sup>Department of Earth and Planetary Sciences, University of Tennessee, Knoxville,  
14 Tennessee, USA

15 <sup>2</sup>Department of Microbiology, University of Tennessee, Knoxville, Tennessee, USA

16 <sup>3</sup>Department of Marine Science, University of Texas-Austin, Marine Science Institute,  
17 Port Aransas, Texas, USA

18 <sup>4</sup>Department of Biology, University of North Carolina at Chapel Hill, Knoxville,  
19 Tennessee, USA

20 <sup>5</sup>Department of Marine Sciences, University of North Carolina at Chapel Hill, USA

21 <sup>6</sup>Present address: College of Medicine, University of Tennessee Health Science Center,  
22 Memphis, Tennessee, USA

23 <sup>7</sup>Present address: Brody School of Medicine, East Carolina University, Greenville, North  
24 Carolina, USA

25 <sup>8</sup>Present address: Department of Biological Sciences, Louisiana State University, Baton  
26 Rouge, Louisiana, USA

27

28 \*Corresponding: [asteen1@utk.edu](mailto:asteen1@utk.edu)

29 **Abstract**

30 Microbial communities inhabiting subsurface sediments contain abundant heterotrophs,  
31 which oxidize organic matter to obtain carbon and energy. Subsurface sediments contain  
32 very low concentrations of canonically bioavailable compounds, and it is not clear what  
33 fraction of sedimentary organic matter the community metabolizes. To gain a more  
34 mechanistic understanding of subsurface heterotrophy, we studied both the genetic  
35 potential encoded within metagenomes for extracellular peptidase production, and  
36 experimentally assayed the potential activities of a wide range of extracellular peptidases  
37 in sediments of the White Oak River estuary, NC. Deeply sequenced metagenomes  
38 revealed genes coding for at least 15 classes of extracellular peptidases. We observed  
39 enzyme-catalyzed hydrolysis of 11 different peptidase substrates in subsurface sediments.  
40 Potential activities ( $V_{max}$ ) of extracellular peptidases decreased downcore, but cell-  
41 specific  $V_{max}$  was relatively constant and similar to values observed in seawater  
42 phytoplankton blooms. Decreases in half-saturation constants and relative increases in  
43 activities of D-phenylalanyl aminopeptidase and ornithyl aminopeptidase with depth  
44 indicate a community of heterotrophs that is adapted to access degraded organic matter.  
45 These results suggest a subsurface heterotrophic community that converts degraded  
46 organic matter into a bioavailable form, rather than a surface-adapted community relying  
47 on ever-decreasing concentrations of more labile organic matter.

48  
49  
50

## 51 **Introduction**

52 Marine sediments are one of the largest microbial environments on earth  
53 (Kallmeyer et al. 2012). Many sedimentary microbes appear to be heterotrophs, slowly  
54 metabolizing organic matter (Jørgensen and Marshall, 2016; Biddle *et al.*, 2006), but the  
55 mechanisms by which these heterotrophs access old, unreactive organic carbon remain  
56 poorly characterized.

57 In surface environments, where photosynthesis fuels carbon fixation,  
58 heterotrophic microorganisms gain energy from a combination of small molecules (<600-  
59 1000 Da), which can be taken up directly via general uptake porins (Benz and Bauer,  
60 1988) and macromolecules, which must be broken down outside of the cell by  
61 extracellular enzymes. Because most freshly-produced organic matter is macromolecular  
62 and large molecules tend to be more bioavailable than small ones (Benner and Amon,  
63 2015), the nature and activity of extracellular enzymes present in surface environments is  
64 a major control on the rate of microbial carbon oxidation in such environments.

65 It is not clear whether microbial extracellular enzymes play the same role in  
66 subsurface sediments. Extracellular peptidase activity has been identified in sapropels up  
67 to 389 cm below seafloor (cmbsf) in the eastern Mediterranean Sea (Coolen and  
68 Overmann, 2000; Coolen *et al.*, 2002), in sediment from 600-630 cmbsf in Aarhus Bay  
69 sediments (Lloyd *et al.*, 2013b) and in the interior of seafloor basalts at the Loihi  
70 seamount (Jacobson Meyers *et al.*, 2014). However, the nature and relative importance of  
71 extracellular enzymes in subsurface environments remains poorly constrained because  
72 these studies examined few samples, and only limited enzymatic classes and sample  
73 numbers were assayed. It is possible that, like heterotrophs in surface environments,  
74 heterotrophs in subsurface environments mainly gain access to organic carbon via  
75 extracellular enzymes. On the other hand, some of the unique aspects of subsurface  
76 sediments suggest that extracellular enzymes might not be an effective strategy to obtain  
77 carbon or energy. First, subsurface sediments contain markedly fewer bioavailable  
78 compounds such as amino acids and sugars than do surface sediments (Burdige, 2007).  
79 Therefore, these compounds may be insufficiently abundant to be viable heterotrophic  
80 substrates. Second, in order for the production of extracellular enzymes to be part of a  
81 viable metabolic strategy, each enzyme must, over its lifetime, provide the cell with at

82 least as much carbon or energy as was required to synthesize the enzyme (Vetter *et al.*,  
83 1998; Allison, 2005; Schimel and Weintraub, 2003). In subsurface sediments, where  
84 metabolic rates may be orders of magnitude slower at the surface, enzyme lifetimes  
85 would need to be correspondingly longer to become ‘profitable’. Since enzyme lifetimes  
86 are finite, there must exist a community metabolic rate below which extracellular enzyme  
87 lifetimes are too short to become profitable. Unfortunately that limit is difficult to  
88 quantify because enzyme lifetimes in any environment are poorly constrained (e.g., Steen  
89 and Arnosti, 2011).

90 It is also possible that extracellular enzymes are not the primary mechanism by  
91 which heterotrophs access sedimentary organic matter. More exotic mechanisms, such as  
92 abiotic liberation by reactive species formed from radioactive decay of naturally-present  
93 radioisotopes (e.g. Blair *et al.*, 2007) are conceivable, but have not been demonstrated.  
94 The goals of this work are to determine whether subsurface heterotrophic communities  
95 make substantial use of extracellular enzymes to access organic matter, and if so, to  
96 characterize the set of enzymes used.

97 We investigated genes for extracellular enzymes and the activities of  
98 corresponding enzymes in sediments of the White Oak River, NC by estimating the  
99 presence of peptidase families in available metagenomic sequencing data and  
100 complementing this by measuring the hydrolysis rates of eleven potential peptidase  
101 substrates. This site was chosen because the porewater geochemistry and microbiology of  
102 these sediments has been well-characterized (Martens and Goldhaber, 1978; Kelley *et al.*,  
103 1990; Baker *et al.*, 2015; Lazar *et al.*, 2016; Lloyd *et al.*, 2011) and because they contain  
104 abundant Bathyarchaeota and Marine Benthic Group D archaea, which appear to be  
105 capable of metabolizing detrital organic matter (Kubo *et al.*, 2012; Lloyd *et al.*, 2013b;  
106 Meng *et al.*, 2014). We focused on peptidases because protein degradation appears to be  
107 an important metabolism for some subsurface archaea (Lloyd *et al.*, 2013b) and because  
108 peptidases were more active than other enzymes in similar environments (Coolen and  
109 Overmann, 2000; Jacobson Meyers *et al.*, 2014). Because environmental samples contain  
110 a wide range of distinct peptidases at variable activities (Obayashi and Suzuki, 2005;  
111 Steen and Arnosti, 2013) we measured the hydrolysis of eleven different substrates that  
112 may be hydrolyzed by structurally and genetically diverse extracellular peptidases. By

113 measuring potential activities (i.e., the capacity of the enzyme to catalyze hydrolysis if  
114 substrate concentrations were not limiting) and substrate affinities of microbial  
115 extracellular enzymes, we illuminated some of the mechanisms by which subsurface  
116 heterotrophic communities access organic carbon.

## 117 **Materials and Methods**

### 118 STUDY SITE

119 Samples were collected from Station H in the White Oak River Estuary, 34°  
120 44.490' N, 77° 07.44' W, first described by Gruebel and Martens (1984). The White Oak  
121 River Estuary occupies a drowned river valley in the coastal plain of North Carolina.  
122 Station H is characterized by salinity in the range of 10 to 28 and water depth on the  
123 order of 2 m. The flux of  $\Sigma\text{CO}_2$  across the sediment-water interface was  $0.46 \pm 0.02$   
124  $\text{mmol m}^{-2} \text{hr}^{-1}$  (measured in May of 1987), primarily due to organic carbon oxidation via  
125 sulfate reduction, and the sediment accumulation rate averages  $0.3 \text{ cm yr}^{-1}$  (Kelley *et al.*,  
126 1990). Total organic carbon content is approximately 5%. For this study, push cores of  
127 40-85 cm were collected from Station H by swimmers on May 28, 2013, June 14, 2014,  
128 and October 22, 2014. In 2013, cores were transported to the nearby Institute of Marine  
129 Sciences (University of North Carolina) at Morehead City, where they were sectioned  
130 and processed for enzyme activities, porewater geochemistry, and cell counts within 6  
131 hours of sample collection. Porewater sulfate in 2013 was depleted by 43.5 cm, and  
132 methane peaked at 79.5 cm (Fig S1). In 2014, cores were transported on the day of  
133 sampling to the University of Tennessee, Knoxville, stored at 4 °C, and processed for  
134 enzyme activities the following day. Samples for metagenomic analysis were collected  
135 separately in October 2010 from three sites (sites 1, 2, and 3, as previously described by  
136 Baker *et al* (2015)), all of which are within 550 m of Station H.

### 137 METAGENOMIC ANALYSIS

138 To resolve the taxonomic distribution of extracellular peptidases we searched a  
139 pre-existing White Oak River *de novo* assembled and binned metagenomic dataset (Baker  
140 *et al.*, 2015) for genes that were assigned extracellular peptidase functions. These  
141 assignments were based on best matches to extracellular peptidases in KEGG, pfam, and

142 NCBI-nr (non-redundant) databases using the IMG annotation pipeline (Markowitz et al.,  
143 2014). Genes were additionally screened for signal peptidase motifs using the following  
144 programs: PrediSI setting the organism group to gram-negative bacteria (Hiller *et al.*,  
145 2004), PRED-Signal trained on archaea (Bagos *et al.*, 2009), the standalone version of  
146 PSORT v.3.0 trained against archaea (Yu *et al.*, 2010), and SignalIP 4.1 using gram-  
147 negative bacteria as organism group (Petersen *et al.*, 2011). All programs were used with  
148 default settings if not stated otherwise. Results are provided in Supplementary Table 1.

149 In total, binned genomes from three different depth zones of White Oak River  
150 sediments were examined. The sulfate-rich zone (SRZ) genomes were obtained from sites  
151 2 and 3 core sections 8-12 and 8-10 cm, respectively. The sulfate-methane transitions  
152 zone (SMTZ) genomes were recovered from site 2 and 3 and depths of 30-32 cm and 24-  
153 28 cm. The methane-rich zone (MRZ) was from site 1 and 52-54 cm. Many of these  
154 genes were binned to Bacteria (Baker et al. 2015) and Archaea community members  
155 (Baker *et al.*, 2016; Lazar *et al.*, 2016; Seitz *et al.*, 2016). Taxonomic assignments of  
156 peptidases identified in the community were based on this binning information. However,  
157 since not all of the peptidases were binned, we used top matches to NCBI to identify the  
158 unbinned genes. The majority of the Archaea present in the shallow (8-12 cm) sulfate-  
159 rich zone were confidently binned, thus were used to determine the relative contributions  
160 of archaeal extracellular peptidases (Fig 1b). A smaller proportion of the bacterial  
161 peptidase genes were (68% of SRZ, 24% of SMTZ, and 27% of MRZ) confidently  
162 binned, therefore, classification was based on top BLAST hits to NCBI. These  
163 classifications were then refined using the bin assignments.

#### 164 ENZYME ASSAYS

165 Enzyme assays were performed using different protocols in 2013 versus 2014. In  
166 2013, enzyme assays were performed according to a protocol similar to the one described  
167 in Lloyd et al (2013). Cores were sectioned into 3 cm intervals. The following intervals  
168 were selected for enzyme assays: 0-3 cm, 3-6 cm, 27-30 cm, 57-60 cm, and 81-83 cm.  
169 Each section was homogenized, and approximately 0.5 ml wet sediment was transferred  
170 into separate 5 ml amber glass serum vials, which had been pre-weighed and preloaded  
171 with 4 ml anoxic artificial seawater (Sigma Sea Salts, salinity = 15, pH=7.5) Samples  
172 were weighed again to determine the precise mass of wet sediment added, and then an

173 appropriate quantity of 20 mM peptidase substrate stock dissolved in DMSO was added,  
174 up to 90  $\mu$ L, for final substrate concentrations of 0, 25, 50, 75, 100, 200, or 300  $\mu$ M.  
175 Triplicate incubations with 400  $\mu$ M Arg-AMC, Gly-AMC, Leu-AMC and Gly-Gly-Arg-  
176 AMC were also created, but these were omitted for Ala-Ala-Phe-AMC and Boc-Phe-Val-  
177 Arg-AMC because the latter two substrates are considerably more expensive than the first  
178 four substrates. Each serum vial was vortexed, briefly gassed with N<sub>2</sub> to remove oxygen  
179 introduced with the sample, and approximately 1.3 ml slurry was immediately removed,  
180 transferred to a microcentrifuge tube, and placed on ice to quench the reaction. The  
181 precise time of quenching was recorded. This was centrifuged at 10,000  $\times$  g within  
182 approximately 15 minutes. The supernatant was transferred to a methacrylate cuvette and  
183 fluorescence was measured with a Turner Biosystems TBS-380 fluorescence detector set  
184 to “UV” ( $\lambda_{\text{ex}}$ =365-395 nm,  $\lambda_{\text{em}}$ =465-485 nm). Samples were then incubated at 16 °C,  
185 approximately the in situ temperature, and the sampling procedure was repeated after  
186 approximately 3 hours. The rate of fluorescence production was calculated as the increase  
187 in fluorescence for each sample divided by the elapsed time between sample quenching.  
188 Killed controls were made using homogenized, autoclaved sediments from 35-45 cmbsf.  
189 However, we note that autoclaving does not destroy sediment enzymes because sorption  
190 to mineral surfaces stabilizes enzyme structure, vastly increasing their ability to maintain  
191 a functional conformation at high temperatures (Stursova and Sinsabaugh, 2008; Carter *et*  
192 *al.*, 2007; Schmidt, 2016). We therefore used the autoclaved samples as a qualitative  
193 control for the null hypothesis that enzymes were responsible for none of the observed  
194 substrate hydrolysis, rather than as a quantitative method to distinguish enzymatic  
195 substrate hydrolysis from potential abiotic effects. In some sediments, a large fraction of  
196 fluorophore can sorb to particles, requiring a correction to observed fluorescence (Coolen  
197 *et al.*, 2002; Coolen and Overmann, 2000), but we observed negligible sorption of  
198 fluorophore to the White Oak River sediments.

199 In 2014, enzymes were assayed using a protocol based on the approach of Bell *et*  
200 *al* (2013), which was designed for soil enzyme assays. In this approach, peptidase  
201 substrates were mixed with sediment-buffer slurries in 2-mL wells of a deep-well plate.  
202 These plates were periodically centrifuged and 250  $\mu$ L aliquots of supernatant were  
203 transferred into a black 96-well microplate. Fluorescence was read using a BioTek



204 Cytation 3 microplate reader ( $\lambda_{\text{ex}} = 360 \text{ nm}$ ,  $\lambda_{\text{em}} = 440 \text{ nm}$ ). Results from this method  
205 proved considerably noisier than the single-cuvette method used in 2013, so kinetic  
206 parameters ( $V_{\text{max}}$  and  $K_m$ ) were not calculated for these data. Nevertheless, results were  
207 qualitatively similar to those from 2013, and we have reported  $V_{\text{max}}$  from 2014 as  $v_0$   
208 measured at 400  $\mu\text{M}$  substrate concentration, which was saturating. In June 2014, the  
209 following substrates were assayed: AAF-AMC, Arg-AMC, Boc-VPR-AMC, D-Phe-  
210 AMC, Gly-AMC, Leu-AMC, L-Phe-AMC, Orn-AMC, Z-Phe-Arg-AMC, and Z-Phe-Val-  
211 Arg-AMC. In October 2014, L-Phe-AMC, D-Phe-AMC, and Orn-AMC were assayed  
212 according to the same protocol in 3-cm core sections at 1.5, 4.5, 7.5, 10.5, 19.5, 22.5,  
213 25.5, 28.5, 34.5, 37.5, 40.5, 43.5, 49.5, 52.5, 58.5, and 61.5 cmbsf. Substrate details are  
214 given in Table S2.

## 215 GEOCHEMICAL AND MICROBIOLOGICAL MEASUREMENTS

216 Sediment porosity was measured by mass after drying at 80 °C, according to the equation  
217

$$\phi = \frac{m_w / \rho_w}{m_w / \rho_w + \frac{m_d - S \times m_w / 1000}{\rho_{ds}}}$$

218

219

220 Here,  $m_w$  represents mass lost after drying,  $\rho_w$  represents the density of pure water,  $m_d$   
221 represents the mass of the dry sediment,  $S$  represents salinity in  $\text{g kg}^{-1}$ , and  $\rho_{ds}$  represents  
222 the density of dry sediment (assumed to be  $2.5 \text{ g cm}^{-3}$ ). Porewater sulfate concentrations  
223 were measured using a Dionex Ion Chromatograph (Sunnyvale, CA) in porewater that  
224 was separated by centrifugation in 15 ml centrifuge tubes at  $5000 \times g$  for 5 minutes,  
225 filtered at  $0.2 \mu\text{m}$ , and acidified with 10% HCl. Methane was measured using 3 ml  
226 sediment subsamples that were collected from a cutoff syringe, entering through the side  
227 of a core section, immediately after core extrusion. Subsamples were deposited  
228 immediately in a 20 ml serum vial containing 1 ml, 0.1 M KOH. These were immediately  
229 stoppered and shaken to mix sediment with KOH. Methane was later measured by  
230 injecting 500  $\mu\text{l}$  of bottle headspace into a GC-FID (Agilent, Santa Clara, CA) using a  
231 headspace equilibrium method (Lapham *et al.*, 2008).



## 232 CELL ENUMERATION

233 Cells were enumerated by direct microscopic counts. One mL of sediment was placed in  
234 a 2-mL screw-cap tube with 500  $\mu$ l of 3% paraformaldehyde in phosphate buffered saline  
235 (PBS), in which it was incubated overnight before being centrifuged for 5 minutes at  
236 3000  $\times$  g. The supernatant was removed and replaced with 500  $\mu$ l of PBS, vortexed  
237 briefly and centrifuged again at 3000  $\times$  g. The supernatant was subsequently removed and  
238 replaced with a 1:1 PBS:ethanol solution. Sediments were then sonicated at 20% power  
239 for 40 seconds to disaggregate cells from sediments and diluted 40-fold into PBS prior  
240 to filtration onto a 0.2  $\mu$ m polycarbonate filter (Fisher Scientific, Waltham, MA) and  
241 mounted onto a slide. Cells were stained with 4',6-diamidino-2-phenylindole (DAPI) and  
242 enumerated by direct counts using a Leica Epifluorescence Microscope.

243

## 244 GEOCHEMICAL MODELING

245 Organic carbon remineralization rates as a function of depth were estimated by  
246 applying a multi-component reaction-transport model to depth distributions of sulfate and  
247 methane concentration. The model is based on equations described in Boudreau (1996)  
248 and includes only sulfate reduction and methane production due to lack of data regarding  
249 oxic and suboxic processes. Thus the model is limited to depths greater than 4.5 cm  
250 where sulfate reduction and methane production are the dominant processes, and  
251 bioirrigation and bioturbation may be assumed to be negligible. The organic matter  
252 remineralization rate is parameterized using the multi-G model first proposed by  
253 Jørgensen (1978); a two-component model was sufficient to accurately simulate the  
254 sulfate and methane data. For solutes, the upper boundary conditions were measured  
255 values at 4.5 cm while the lower boundary conditions (200 cm) were set to zero-gradient.  
256 The flux of reactive organic carbon to 4.5 cm was calculated from the sulfate flux across  
257 the 4.5 cm horizon and an estimate of methane burial below the lower boundary (the  
258 methane flux at the upper boundary was observed to be zero), with an assumed oxidation  
259 state of reactive carbon of -0.7. The model contains four adjustable parameters that are  
260 set to capture the major details of measured sulfate and methane data: first-order rate

261 constants for both fractions of the reactive carbon pool; the partitioning factor for both  
262 fractions, and the rate constant for methane oxidation.

## 263 **Results and Discussion**

264 A total of 3739 genes encoding extracellular peptidases were identified among  
265 metagenomes from the three depth zones examined, including 685 from SRZ, 1994 from  
266 SMTZ, and 1060 from MRZ. Of the genes encoding for peptidases, 0-71% (depending on  
267 algorithm and sediment depth) contained a signal peptide and are likely secreted by the  
268 SEC-dependent transport system. Among the genes with signal peptidases, zinc  
269 carboxypeptidases, peptidases of class C25 and genes of the clostripain family are most  
270 likely to be secreted (Table S3). We note that alternative secretion pathways exist,  
271 including bacterial lysis and Sec-independent secretion systems (Bendtsen *et al.*, 2005),  
272 although the importance of these systems has not to our knowledge been assessed. At all  
273 three depths, peptidases of class C25, belonging to the gingipain family, were the most  
274 abundant extracellular peptidases (Fig 1a). Gingipains are endopeptidases (i.e., enzymes  
275 that cleave proteins mid-chain rather than from the N- or C-termini) with strong  
276 specificity for the residue arginine on the N-terminal side of the scissile bond (Rawlings  
277 and Barrett, 1999). Bathyarchaeota, which are abundant in sediments of the White Oak  
278 River, use extracellular gingipain (among other peptidases) to degrade detrital protein-  
279 like organic matter (Kubo *et al.*, 2012; Lloyd *et al.*, 2013b). Genes annotated as encoding  
280 extracellular methionine aminopeptidases and zinc carboxypeptidases were also  
281 abundant. The composition of protein families was generally consistent with depth, but  
282 genes for clostripain (another endopeptidase with preference for Arg N-terminal to the  
283 scissile bond) and S24 peptidases (a regulatory peptidase involved in the SOS stress  
284 response) were slightly enriched in the SMTZ.

285 In SRZ, Bacteria accounted for 61% of genes for extracellular peptidases for  
286 which a lineage could be assigned, increasing to 69% in MRZ (Fig 1b). Archaeal  
287 peptidases decreased from 39% in SRZ to 30% in MRZ, while Eukaryota accounted for  
288 <1.5% at all depths. Consistent with this distribution, bacteria make up ca. 40-60% of  
289 cells in White Oak River sediments as determined by CARD-FISH counts, with no  
290 pronounced depth trend (Lloyd *et al.*, 2013a). Since the majority of the archaeal

291 peptidases in the SRZ were assigned to genomic bins, we were able to accurately classify  
292 them. Interestingly, over half of the archaeal SRZ peptidases belong to marine benthic  
293 group D (MBG-D) genomic bins (Fig 1c)(Lazar et al. in review). Additionally, a large  
294 portion of the peptidases in the SRZ belong to newly described Archaea belonging to the  
295 Asgard superphylum (Zaremba-Niedzwiedzka *et al.*) including Lokiarchaeota (Spang *et*  
296 *al.*, 2015) and Thorarchaeota (Seitz *et al.*, 2016). Little is known about the ecological  
297 roles of these novel Archaea. It has recently been shown that they contain metabolic  
298 pathways for the degradation of proteins and acetogenesis (Seitz *et al.*, 2016). Sources of  
299 bacterial peptidases varied less with depth than sources of archaeal peptidases, with  
300 Proteobacteria, Bacteroidetes, and Firmicutes among the dominant phyla (Fig 1d). 13-  
301 20% of extracellular peptidase genes belonged to bacteria but could not be assigned a  
302 phylum, and 19-22 phyla contributed extracellular peptidases at each depth.  
303 Deltaproteobacteria and Gammaproteobacteria dominated the SRZ community at the  
304 White Oak River (Baker *et al.*, 2015), and accordingly the largest portion of the  
305 extracellular peptidases also belong to them. These phylogenetic groups decrease with  
306 depth in the SMTZ and MRZ, however, Deltaproteobacteria contribute a large portion of  
307 extracellular peptidases downcore. Although these groups are commonly thought to rely  
308 on sulfur and nitrogen respiration, these genomes were shown to contain metabolic  
309 pathways for the degradation and fermentation of organic carbon (Baker *et al.*, 2015).  
310 Additionally, several phyla thought to be involved in fermentation of detrital carbon  
311 including *Clostridia*, *Bacteroidetes*, *Planctomycetes*, and the candidate phyla radiation  
312 (CPR) constitute larger portions of the peptidases in the SMTZ and MRZ.

313 Bioinformatic tools are a powerful way to investigate the potential of microbial  
314 communities to oxidize complex organic molecules, but these tools do not provide  
315 information about the expression level of genes or the in situ activities of gene products  
316 and annotation algorithms often fail to identify the precise function of hydrolases,  
317 particularly in deeply-branching lineages (e.g., Michalska *et al.*, 2015). Thus, we  
318 measured the potential activities of a wide range of extracellular peptidases in the WOR  
319 sediments. In 2013 (when the assay protocol used was more sensitive), all six peptidase  
320 substrates tested were hydrolyzed faster in untreated sediments than in autoclaved

321 controls (Fig 2, Fig S2). Kinetics of substrate hydrolysis were consistent with the  
322 Michaelis-Menten rate law,

323

$$324 \quad v_0 = (V_{\max} + [S]) / (K_m + [S]),$$

325

326 which is characteristic of purified hydrolases as well as mixtures of isofunctional  
327 enzymes in environmental samples (Steen *et al.*, 2015; Sinsabaugh *et al.*, 2014).

328 Together, these lines of evidence show that the observed substrate hydrolysis was due to  
329 extracellular peptidases rather than abiotic factors. Combining data from all three  
330 sampling dates, unambiguous hydrolysis of eleven different peptidase substrates was  
331 observed.

332         The diverse substrates used in this study were apparently cleaved by a wide  
333 variety of peptidases, including aminopeptidases (peptidases that cleave an N-terminal  
334 amino acid from a protein) and endopeptidases (peptidases that cleave internal peptide  
335 bonds). Peptide bonds adjacent to a diverse set of amino acid residues were cleaved,  
336 including glycine (the smallest amino acid), phenylalanine (among the largest amino  
337 acids), arginine (positively charged at porewater pH) and leucine (uncharged,  
338 hydrophobic). Individual extracellular peptidases can often accept a fairly broad range of  
339 substrates, and sometimes a substrate may primarily be hydrolyzed by an enzyme that  
340 exhibits maximal activity towards a different substrate. For instance, in pelagic samples  
341 from Bogue Sound, an estuary in North Carolina, the substrate Leu-AMC, which is  
342 putatively a substrate for leucine aminopeptidase, was hydrolyzed more by arginine  
343 aminopeptidase than by leucine aminopeptidase (Steen *et al.*, 2015). Nevertheless, the  
344 large diversity of substrates that were hydrolyzed in this study suggests a diverse set of  
345 peptidases, as has previously been observed in pelagic samples (Obayashi and Suzuki,  
346 2008, 2005; Steen and Arnosti, 2013).

347         Bulk enzyme activities ( $V_{\max}$  values) decreased with increasing depth (Fig 3a).  
348 However, no trend was evident in  $V_{\max}$  values expressed per cell (Fig 3b), and  $V_{\max}$   
349 expressed relative to bulk organic carbon oxidation rate increased downcore by nearly  
350 two orders of magnitude (Figs 3c-d).  $V_{\max}$  per cell was approximately 100-200 amol cell<sup>-1</sup>  
351 hr<sup>-1</sup> throughout the core, comparable to previous measurements made in a surface

352 sediments (2-100 amol cell<sup>-1</sup> hr<sup>-1</sup>) and surface seawater (mostly less than 100 amol cell<sup>-1</sup>  
353 hr<sup>-1</sup>, but with some measurements up to 10 nmol cell<sup>-1</sup> hr<sup>-1</sup>) (Vetter and Deming, 1994).  
354 Modeled organic carbon oxidation due to sulfate reduction and methane production  
355 decreased from 16.2 μmol C l wet sediment<sup>-1</sup> hr<sup>-1</sup> at 4.5 cm (the top of the model  
356 domain) to 0.0312 μmol C l wet sediment<sup>-1</sup> hr<sup>-1</sup> at 82.5 cm, a decrease of a factor of 519  
357 (or a factor of 1650, relative to the extrapolated organic carbon oxidation rate of 51.4  
358 μmol C l wet sediment<sup>-1</sup> hr<sup>-1</sup> at 1.5 cm, an estimate which should be considered a lower  
359 bound for reasons described in the methods section). The sum of  $V_{max}$  of all peptidases  
360 measured in 2013 decreased from 94.7 μmol g sed<sup>-1</sup> hr<sup>-1</sup> at 1.5 cm to 12.8 μmol g sed<sup>-1</sup> hr<sup>-1</sup>  
361 at 82.5 cm depth, a decrease of a factor of 7.4. The ratio of summed peptidase  $V_{max}$  to  
362 organic carbon oxidation rate correspondingly increased from 1.8 to 410. The absolute  
363 value of that ratio is sensitive to the precise set of enzyme included in the sum, but the  
364 trend is clear: as sediment depth increased, the potential activity of extracellular  
365 peptidases increased faster than the actual rate of organic carbon oxidation.  $V_{max}$  is a  
366 rough proxy for the concentration of enzymes in an environment, so an increase in  $V_{max}$   
367 relative to carbon oxidation rate suggests that subsurface microbial communities  
368 produced similar quantities of enzyme per cell as surface communities, but those  
369 enzymes returned less bioavailable organic matter, presumably due to lower substrate  
370 concentrations.

371 In the sense of bulk activities, therefore, subsurface heterotrophic communities in  
372 WOR seem to be similar their surface counterparts in terms of reliance on extracellular  
373 enzymes to access organic matter, although metabolisms are slower in the subsurface.  
374 However, there are indications from enzyme kinetics and activities of specific enzymes  
375 that subsurface communities are specialized for their environment. Peptidase  $K_m$  values  
376 decreased with increasing depth (Fig 4, ANCOVA, F(5, 22)=4.44, p < 0.05). When  
377 substrate concentrations are considerably less than  $K_m$ , as they likely are in subsurface  
378 sediments, *in situ* substrate hydrolysis rates are controlled more by  $K_m$  than by  $V_{max}$   
379 (Steen and Ziervogel, 2012; Cornish-Bowden, 2012), so decreasing  $K_m$  values may be an  
380 adaptive response to low bioavailable substrate concentrations in subsurface sediments  
381 (Sinsabaugh *et al.*, 2014).

382           The trends in  $K_m$  warrant some discussion of how  $K_m$  values are measured and  
383 interpreted. As with all environmental enzyme assays, our measurements relied on  
384 measuring the rate of reaction of an artificial substrate that was added to the sample. The  
385 sample also contained some quantity of natural substrate (i.e., proteins or peptides). This  
386 naturally-present substrate can be viewed as a competitive inhibitor of the added artificial  
387 substrate (Cornish-Bowden, 2012). As a consequence, the  $K_m$  we measure ( $K_{m,app}$ ) is  
388 actually the sum of the true enzyme  $K_m$  plus the concentration of *in situ* enzyme substrate  
389 ( $[S_{is}]$ );  $K_{m,app} = K_m + [S_{is}]$ . It is therefore possible that the observed decrease in  $K_{m,app}$   
390 actually reflects a change in the concentration of natural peptidase substrates with depth,  
391 rather than a change in substrate affinity of peptidases.  $[S_{is}]$  is extremely difficult to  
392 measure (or even to define precisely) because it reflects the sum of the concentrations of  
393 all of the individual molecules which can act as substrate for a given peptidase, modified  
394 by the degree to which the peptidase is capable of accessing each substrate.  $[S_{is}]$  almost  
395 certainly decreased downcore, since a decrease in the concentration of enzymatically-  
396 hydrolyzable, protein-like organic matter is a diagnostic feature of aged organic matter  
397 (Amon *et al.*, 2001; Dauwe *et al.*, 1999). However, it is very unlikely that  $[S_{is}]$  could have  
398 decreased enough to cause more than a negligible fraction of the observed decreases in  
399  $K_m$ , which were ranged from 110  $\mu\text{M}$  (GGR-AMC) to 990  $\mu\text{M}$  (AAF-AMC). Sediments  
400 of Aarhus Bay, which are similar to those of the White Oak River in terms of organic  
401 matter content and grain size, are characterized by porewater dissolved combined amino  
402 acid concentrations in the range of 50-150  $\mu\text{M L}^{-1}$  (Pedersen *et al.*, 2001). However, only  
403 a fraction of total dissolved protein-like material can act as substrate for any given  
404 peptidase. Only 10-40% of total combined amino acids in sediments are accessible to  
405 added peptidases (Dauwe *et al.*, 1999), and a smaller fraction may be available to the  
406 specific peptidases measured in this study. Furthermore,  $K_m$  values were measured in a  
407 9:1 buffer:sample slurry, so  $[S_{is}]$  in the slurry would be one-tenth of *in situ*  $[S_{is}]$ . By  
408 multiplying assumed porewater substrate concentrations (from Aarhus Bay) by the  
409 fraction that is enzymatically hydrolysable and dividing by 10 to account for dilution in  
410 the slurry, we estimate that changes in  $[S_{is}]$  could account for, at most, a 0.5-6  $\mu\text{M}$   
411 decrease in  $K_{m,app}$ . The remainder of the 110-990  $\mu\text{M}$  decrease must be due to changes in

412 the true substrate affinity  $K_m$ , indicating that subsurface enzymes hydrolyze low  
413 concentrations of protein considerably more efficiently than surface enzymes.

414 The suite of specific peptidases that are active in deeper sediments also seems to  
415 reflect adaptation to more degraded organic matter. In order to assess the degree to which  
416 sedimentary extracellular peptidases target more recalcitrant organic matter, rather than  
417 the extremely small pool of relatively labile organic matter, in 2014 we compared  
418 potential activities of D-phenylalanyl aminopeptidase (D-PheAP) and ornithine  
419 aminopeptidase (OrnAP) to those of L-phenylalanyl aminopeptidase (L-PheAP). D-  
420 phenylalanine and ornithine are both markers for degraded organic matter. Most amino  
421 acids are biosynthesized as L-stereoisomers. D-stereoisomers in sedimentary organic  
422 matter can be produced via abiotic racemization of biomass (Bada and Schroeder, 1975;  
423 Steen *et al.*, 2013) or by bacterial reprocessing of phytoplankton-derived OM (Pedersen  
424 *et al.*, 2001; Kaiser and Benner, 2008; Lomstein *et al.*, 2006). Ornithine is non-  
425 proteinogenic amino acid, which does not exist in high concentration in fresh biomass,  
426 but which can be produced in sediments via deamination of arginine and therefore  
427 indicates OM degradation (Hare, 1968; Lee and Cronin, 1984). L-phenylalanine is among  
428 the most recalcitrant amino acids (Dauwe and Middelburg, 1998) but is more labile than  
429 D-phenylalanine or ornithine, so we take L-PheAP activity as a marker of the  
430 community's ability to access relatively fresh OM.

431 D-PheAP:L-PheAP and OrnAP:L-PheAP ratios increased significantly with depth  
432 (Fig 5, D-PheAP:L-Phe-AP:  $p < 0.01$ ,  $r^2 = 0.35$ ,  $n = 16$ ; OrnAP:L-PheAP:  $p < 0.05$ ,  $r^2 = 0.26$ ,  
433  $n = 16$ ), indicating that subsurface communities expressed peptidases that release amino  
434 acids from relatively recalcitrant organic matter. These results do not indicate the actual  
435 flux of organic matter to communities:  $V_{max}$  reflects a potential rate at saturating substrate  
436 concentrations, not an *in situ* rate. Nevertheless, these results suggest that deeper  
437 heterotrophic communities seek to access the larger pool of more recalcitrant organic  
438 matter rather than the smaller pool of more labile organic matter.

439 The absence of a major trend in cell-specific extracellular peptidase activities with  
440 depth in the White Oak River indicates that subsurface heterotrophic microbial  
441 communities rely on extracellular enzymes to access organic carbon to a similar degree  
442 as communities in rapidly-changing environments such as surface seawater. However, the



443 nature of the enzymes, as reflected by their substrate affinities, the specific distribution of  
444 enzyme activities, and the distribution of peptidase genes, changes with depth. These  
445 changes are consistent with community-level adaptation to consuming degraded,  
446 relatively recalcitrant organic matter. Further analysis of the mechanisms by which  
447 subsurface heterotrophs access organic matter may yield continued insights into how  
448 heterotrophic microorganisms live in low-energy environments such as subsurface  
449 sediments.  
450

## 451 Figures

452

453 Fig 1:

454 (a) Frequency of genes for various classes of extracellular peptidases, relative to all genes  
 455 for extracellular peptidases; (b) sources of extracellular peptidases by domain and depth,  
 456 and sources of (c) Archaeal and (d) Bacterial peptidases by phylum and depth.

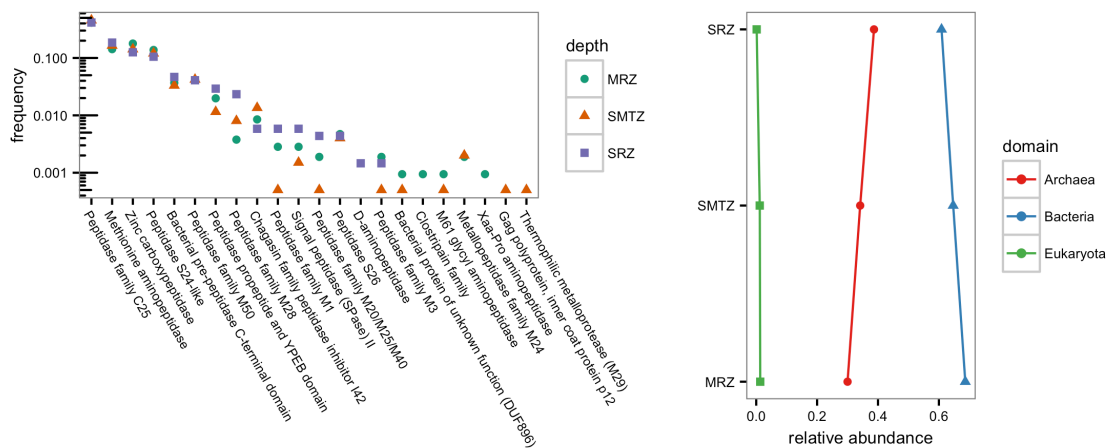

457

458

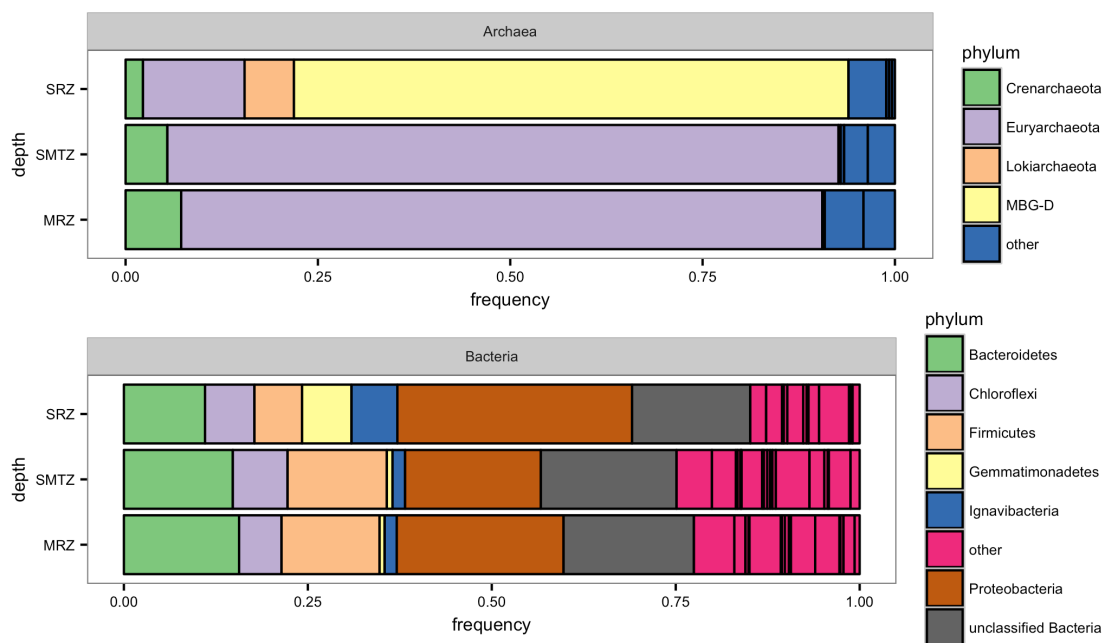

459

460

461 Fig 2: Peptidase saturation curves collected in 2013, showing Michealis-Menten kinetics  
462 consistent with enzymatic rather than abiotic substrate hydrolysis. Open triangles indicate  
463 autoclaved controls.

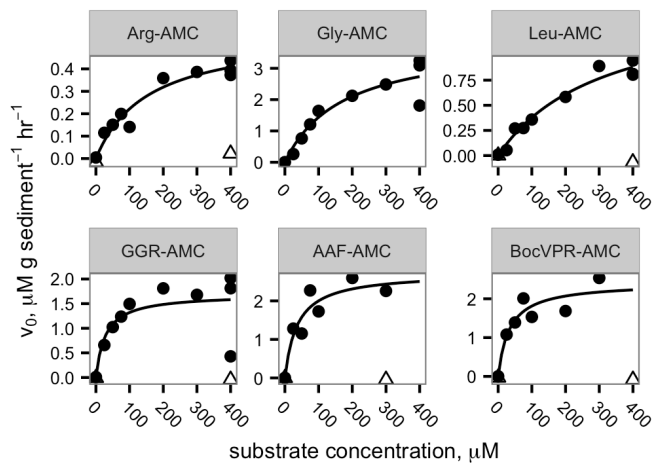

464

465

466

467 Fig 3: Peptidase activities measured in 2013 compared to microbial abundance and  
468 activity. Panel A: summed  $V_{max}$  of the six peptidases measured in 2013, expressed  
469 relative to the value at 1.5 cm. Error bars represent standard error of the estimate of the  
470 rate of fluorophore production. B: Summed  $V_{max}$  relative to cell abundance. Error bars  
471 represent error propagated from error of  $V_{max}$  and standard deviation of cell counts. C:  
472 Modeled organic carbon oxidation rate. D: Summed  $V_{max}$  relative to organic carbon  
473 oxidation rate. Error bars represent standard error of the estimate of the rate of  
474 fluorophore production.

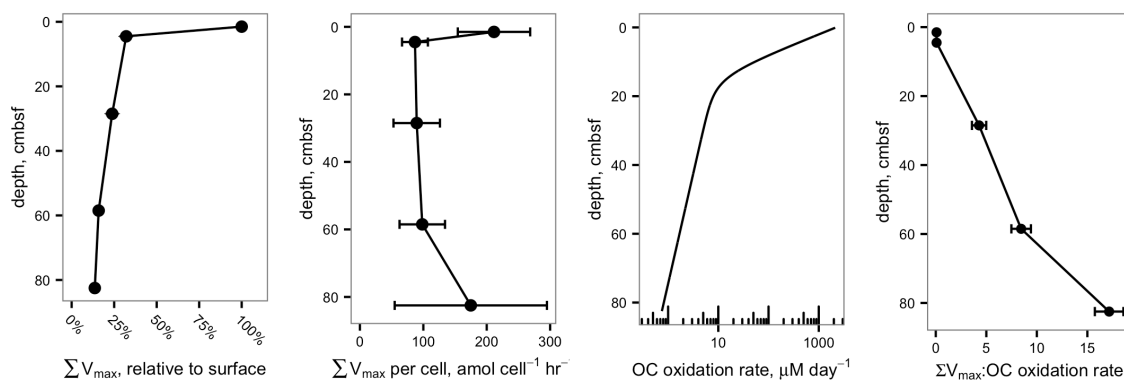

475

476

477

478 Fig 4: Estimated  $K_m$  values as a function of sediment depth. Colored lines indicate linear  
479 regressions for individual substrates, while the black line and shaded area represent a  
480 regression for all substrates taken together.

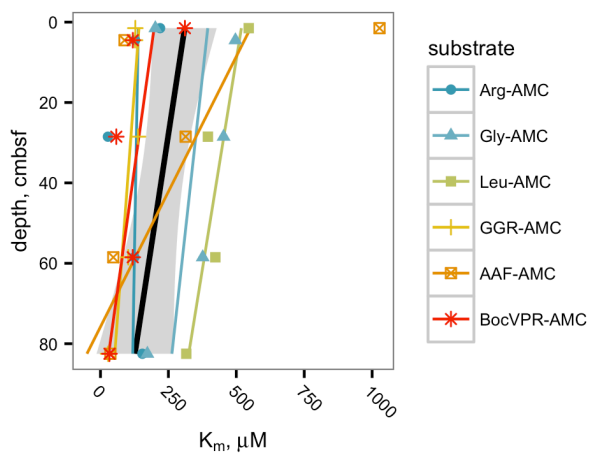

481

482

483 Fig 5: Left panel: Ratio of D-phenylalanyl aminopeptidase activity to L-phenylalanyl  
484 aminopeptidase activity versus depth. Right panel: Ratio of ornithyl aminopeptidase  
485 activity to L-phenylalanyl aminopeptidase activity. The shaded band indicates the 95%  
486 confidence interval of the fitted values.

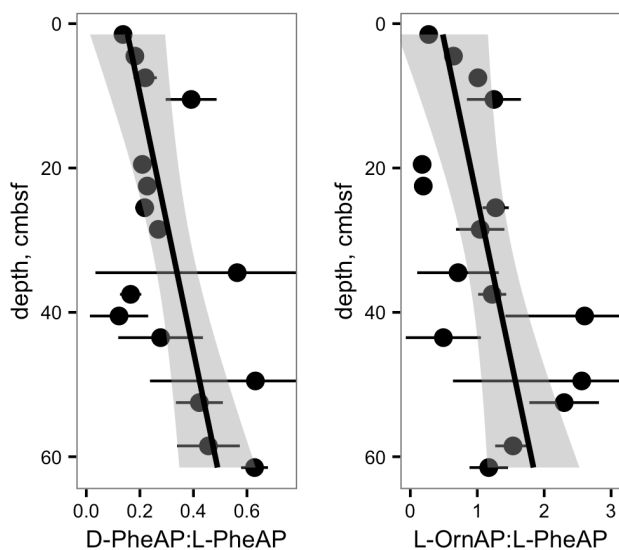

487

488

489

490

491  
492

### 493 **Conflict of interest**

494 The authors declare no competing financial interests in relation to the work described.  
495

### 496 **Acknowledgements**

497 We thank Michael Piehler for access to his laboratory facilities at the University of North  
498 Carolina Institute of Marine Sciences, the captain of the R/V Capricorn for sampling  
499 assistance, and Terry Hazen for use of lab equipment at the University of Tennessee. We  
500 thank Oliver Jeffers for reminding ADS that science is cool. Funding for KHM was  
501 provided by NSF grant DBI-1156644 to Steven W. Wilhelm. Funding for ADS was  
502 provided by NSF grant OCE-1431598 and a C-DEBI subaward. This work is C-DEBI  
503 Contribution number <<to be determined.>>

504  
505  
506  
507  
508



## 509 **References**

- 510 Allison SD. (2005). Cheaters, diffusion and nutrients constrain decomposition by  
511 microbial enzymes in spatially structured environments. *Ecol Lett* **8**: 626–635.
- 512 Amon RMW, Fitznar H-P, Benner R. (2001). Linkages among the bioreactivity, chemical  
513 composition, and diagenetic state of marine dissolved organic matter. *Limnol Oceanogr*  
514 **46**: 287–297.
- 515 Bada JL, Schroeder R a. (1975). Amino acid racemization reactions and their  
516 geochemical implications. *Naturwissenschaften* **62**: 71–79.
- 517 Bagos PG, Tsirigios KD, Plessas SK, Liakopoulos TD, Hamodrakas SJ. (2009).  
518 Prediction of signal peptides in archaea. *Protein Eng Des Sel* **22**: 27–35.
- 519 Baker BJ, Lazar CS, Teske AP, Dick GJ. (2015). Genomic resolution of linkages in  
520 carbon, nitrogen, and sulfur cycling among widespread estuary sediment bacteria.  
521 *Microbiome* **3**: 14.
- 522 Baker BJ, Saw JH, Lind AE, Lazar CS, Hinrichs K-U, Teske AP, *et al.* (2016). Genomic  
523 inference of the metabolism of cosmopolitan subsurface Archaea, Hadesarchaea. *Nat*  
524 *Microbiol* **1**: 16002.
- 525 Bell CW, Fricks BE, Rocca JD, Steinweg JM, McMahon SK, Wallenstein MD. (2013).  
526 High-throughput fluorometric measurement of potential soil extracellular enzyme  
527 activities. *J Vis Exp* e50961.
- 528 Bendtsen JD, Kiemer L, Fausbøll A, Brunak S. (2005). Non-classical protein secretion in  
529 bacteria. *BMC Microbiol* **5**: 58.
- 530 Benner R, Amon RMW. (2015). The size-reactivity continuum of major bioelements in  
531 the ocean. *Ann Rev Mar Sci* **7**: 185–205.
- 532 Benz R, Bauer K. (1988). Permeation of hydrophilic molecules through the outer  
533 membrane of gram-negative bacteria. Review on bacterial porins. *Eur J Biochem* **176**: 1–  
534 19.
- 535 Biddle JF, Lipp JS, Lever MA, Lloyd KG, Sørensen KB, Anderson R, *et al.* (2006).  
536 Heterotrophic Archaea dominate sedimentary subsurface ecosystems off Peru. *Proc Natl*  
537 *Acad Sci U S A* **103**: 3846–51.
- 538 Blair CC, D'Hondt S, Spivack AJ, Kingsley RH. (2007). Radiolytic hydrogen and  
539 microbial respiration in subsurface sediments. *Astrobiology* **7**: 951–70.

- 540 Boudreau BP. (1996). A method-of-lines code for carbon and nutrient diagenesis in  
541 aquatic sediments. *Comput Geosci* **22**: 479–496.
- 542 Burdige DJ. (2007). Preservation of organic matter in marine sediments: controls,  
543 mechanisms, and an imbalance in sediment organic carbon budgets? *Chem Rev* **107**: 467–  
544 85.
- 545 Carter DO, Yellowlees D, Tibbett M. (2007). Autoclaving kills soil microbes yet soil  
546 enzymes remain active. *Pedobiologia (Jena)* **51**: 295–299.
- 547 Coolen MJL, Cypionka H, Sass AM, Sass H, Overmann J. (2002). Ongoing modification  
548 of Mediterranean Pleistocene sapropels mediated by prokaryotes. *Science* **296**: 2407–10.
- 549 Coolen MJL, Overmann J. (2000). Functional Exoenzymes as Indicators of Metabolically  
550 Active Bacteria in 124,000-Year-Old Sapropel Layers of the Eastern Mediterranean Sea.  
551 *Appl Environ Microbiol* **66**: 2589–2598.
- 552 Cornish-Bowden A. (2012). Fundamentals of enzyme kinetics. Fourth Edi. Wiley-VCH  
553 Verlag & Co. KGaA: Weinheim.
- 554 Dauwe B, Middelburg JJ. (1998). Amino acids and hexosamines as indicators of organic  
555 matter degradation state in North Sea sediments. *Limnol Oceanogr* **43**: 782–798.
- 556 Dauwe B, Middelburg JJ, Van Rijswijk P, Sinke J, Herman PMJ, Heip CHR. (1999).  
557 Enzymatically hydrolyzable amino acids in North Sea sediments and their possible  
558 implication for sediment nutritional values. *J Mar Res* **57**: 109–134.
- 559 Gruebel KA, Martens CS. (1984). Radon-222 tracing of sediment-water chemical  
560 transport in an estuarine sediment. *Limnol Oceanogr* **29**: 587–597.
- 561 Hare PE. (1968). Geochemistry of Proteins, Peptides, and Amino Acids. In: Eglinton G,  
562 Murphy MTJ (eds). *Organic Geochemistry: Methods and Results*. Springer-Verlag:  
563 Berlin, Heidelberg, pp 438–462.
- 564 Hiller K, Grote A, Scheer M, Münch R, Jahn D. (2004). PrediSi: Prediction of signal  
565 peptides and their cleavage positions. *Nucleic Acids Res* **32**. e-pub ahead of print, doi:  
566 10.1093/nar/gkh378.
- 567 Jacobson Meyers ME, Sylvan JB, Edwards KJ. (2014). Extracellular enzyme activity and  
568 microbial diversity measured on seafloor exposed basalts from Loihi seamount indicate  
569 the importance of basalts to global biogeochemical cycling. *Appl Environ Microbiol* **80**:  
570 4854–64.

- 571 Jørgensen BB. (1978). A comparison of methods for the quantification of bacterial sulfate  
572 reduction in coastal marine sediments: II. Calculation from mathematical models.  
573 *Geomicrobiol J* **1**: 29–47.
- 574 Jørgensen BB, Marshall IPG. (2016). Slow Microbial Life in the Seabed. *Ann Rev Mar*  
575 *Sci* **8**: 311–32.
- 576 Kaiser K, Benner R. (2008). Major bacterial contribution to the ocean reservoir of detrital  
577 organic carbon and nitrogen. *Limnol Oceanogr* **53**: 99–112.
- 578 Kelley CA, Martens CS, Chanton JP. (1990). Variations in sedimentary carbon  
579 remineralization rates in the White Oak River estuary, North Carolina. *Limnol Oceanogr*  
580 **35**: 372–383.
- 581 Kubo K, Lloyd KG, F Biddle J, Amann R, Teske A, Knittel K. (2012). Archaea of the  
582 Miscellaneous Crenarchaeotal Group are abundant, diverse and widespread in marine  
583 sediments. *ISME J* **6**: 1949–65.
- 584 Lapham LL, Chanton JP, Martens CS, Sleeper K, Woolsey JR. (2008). Microbial activity  
585 in surficial sediments overlying acoustic wipeout zones at a Gulf of Mexico cold seep.  
586 *Geochemistry, Geophys Geosystems* **9**: n/a-n/a.
- 587 Lazar CS, Baker BJ, Seitz K, Hyde AS, Dick GJ, Hinrichs K-U, *et al.* (2016). Genomic  
588 evidence for distinct carbon substrate preferences and ecological niches of  
589 Bathyarchaeota in estuarine sediments. *Environ Microbiol* **18**: 1200–11.
- 590 Lee C, Cronin C. (1984). Particulate amino acids in the sea: Effects of primary  
591 productivity and biological decomposition. *J Mar Res* **42**: 1075–1097.
- 592 Lloyd KG, Alperin MJ, Teske A. (2011). Environmental evidence for net methane  
593 production and oxidation in putative ANaerobic MEthanotrophic (ANME) archaea.  
594 *Environ Microbiol* **13**: 2548–2564.
- 595 Lloyd KG, May MK, Kevorkian RT, Steen AD. (2013a). Meta-analysis of quantification  
596 methods shows that archaea and bacteria have similar abundances in the subseafloor.  
597 *Appl Environ Microbiol* **79**: 7790–9.
- 598 Lloyd KG, Schreiber L, Petersen DG, Kjeldsen KU, Lever M a, Steen AD, *et al.* (2013b).  
599 Predominant archaea in marine sediments degrade detrital proteins. *Nature* **496**: 215–8.
- 600 Lomstein B, Jorgensen B, Schubert C, Niggemann J. (2006). Amino acid biogeo- and  
601 stereochemistry in coastal Chilean sediments. *Geochim Cosmochim Acta* **70**: 2970–2989.

- 602 Martens CS, Goldhaber MB. (1978). Early diagenesis in transitional sedimentary  
603 environments of the White Oak River Estuary, North Carolina. *Limnol Oceanogr* **23**:  
604 428–441.
- 605 Meng J, Xu J, Qin D, He Y, Xiao X, Wang F. (2014). Genetic and functional properties  
606 of uncultivated MCG archaea assessed by metagenome and gene expression analyses.  
607 *ISME J* **8**: 650–9.
- 608 Michalska K, Steen AD, Chhor G, Endres M, Webber AT, Bird J, *et al.* (2015). New  
609 aminopeptidase from ‘microbial dark matter’ archaeon. *FASEB J* **29**: 4071–4079.
- 610 Obayashi Y, Suzuki S. (2008). Occurrence of exo- and endopeptidases in dissolved and  
611 particulate fractions of coastal seawater. *Aquat Microb Ecol* **50**: 231–237.
- 612 Obayashi Y, Suzuki S. (2005). Proteolytic enzymes in coastal surface seawater:  
613 Significant activity of endopeptidases and exopeptidases. *Limnol Oceanogr* **50**: 722–726.
- 614 Pedersen A-GU, Thomsen TR, Lomstein BA, Jørgensen NOG. (2001). Bacterial  
615 influence on amino acid enantiomerization in a coastal marine sediment. *Limnol*  
616 *Oceanogr* **46**: 1358–1369.
- 617 Petersen TN, Brunak S, von Heijne G, Nielsen H. (2011). SignalP 4.0: discriminating  
618 signal peptides from transmembrane regions. *Nat Methods* **8**: 785–6.
- 619 Rawlings ND, Barrett AJ. (1999). MEROPS: The peptidase database. *Nucleic Acids Res*  
620 **27**: 325–331.
- 621 Schimel JP, Weintraub MN. (2003). The implications of exoenzyme activity on microbial  
622 carbon and nitrogen limitation in soil: a theoretical model. *Soil Biol Biochem* **35**: 549–  
623 563.
- 624 Schmidt J. (2016). Microbial Extracellular Enzymes in Marine Sediments: Methods  
625 Development and Potential Activities in the Baltic Sea Deep Biosphere. University of  
626 Tennessee - Knoxville.
- 627 Seitz KW, Lazar CS, Hinrichs K-U, Teske AP, Baker BJ. (2016). Genomic  
628 reconstruction of a novel, deeply branched sediment archaeal phylum with pathways for  
629 acetogenesis and sulfur reduction. *ISME J* **10**: 1696–1705.
- 630 Sinsabaugh RL, Belnap J, Findlay SG, Shah JJF, Hill BH, Kuehn KA, *et al.* (2014).  
631 Extracellular enzyme kinetics scale with resource availability. *Biogeochemistry* **121**:  
632 287–304.

- 633 Spang A, Saw JH, Jørgensen SL, Zaremba-Niedzwiedzka K, Martijn J, Lind AE, *et al.*  
634 (2015). Complex archaea that bridge the gap between prokaryotes and eukaryotes. *Nature*  
635 **521**: 173–179.
- 636 Steen AD, Arnosti C. (2013). Extracellular peptidase and carbohydrate hydrolase  
637 activities in an Arctic fjord (Smeerenburgfjord, Svalbard. *Aquat Microb Ecol* **69**: 93–99.
- 638 Steen AD, Arnosti C. (2011). Long lifetimes of  $\beta$ -glucosidase, leucine aminopeptidase,  
639 and phosphatase in Arctic seawater. *Mar Chem* **123**: 127–132.
- 640 Steen AD, Jørgensen BB, Lomstein BA. (2013). Abiotic Racemization Kinetics of  
641 Amino Acids in Marine Sediments. *PLoS One* **8**. e-pub ahead of print, doi:  
642 10.1371/journal.pone.0071648.
- 643 Steen AD, Vazin JP, Hagen SM, Mulligan KH, Wilhelm SW. (2015). Substrate  
644 specificity of aquatic extracellular peptidases assessed by competitive inhibition assays  
645 using synthetic substrates. *Aquat Microb Ecol* **75**: 271–281.
- 646 Steen AD, Ziervogel K. (2012). Comment on the review by German *et*  
647 *al.*(2011) ‘Optimization of hydrolytic and oxidative enzyme methods for ecosystem  
648 studies’[*Soil Biology & Biochemistry* 43: 1387--1397]. *Soil Biol Biochem* **48**: 196–197.
- 649 Stursova M, Sinsabaugh RL. (2008). Stabilization of oxidative enzymes in desert soil  
650 may limit organic matter accumulation. *Soil Biol Biochem* **40**: 550–553.
- 651 Vetter YA, Deming JW. (1994). Extracellular enzyme activity in the Arctic Northeast  
652 Water polynya. *Mar Ecol Prog Ser* **114**: 23–34.
- 653 Vetter Y, Deming J, Jumars P, Krieger-Brockett B. (1998). A Predictive Model of  
654 Bacterial Foraging by Means of Freely Released Extracellular Enzymes. *Microb Ecol* **36**:  
655 75–92.
- 656 Yu NY, Wagner JR, Laird MR, Melli G, Rey S, Lo R, *et al.* (2010). PSORTb 3.0:  
657 improved protein subcellular localization prediction with refined localization  
658 subcategories and predictive capabilities for all prokaryotes. *Bioinformatics* **26**: 1608–  
659 1615.
- 660 Zaremba-Niedzwiedzka K, Caceres E, Saw J, Backstrom D, Juzokaite L, Vancaester E, *et*  
661 *al.* Metagenomic exploration of Asgard archaea illuminates the origin of eukaryotic  
662 cellular complexity. *Nature*.
- 663

## 664 **Supplemental Material**

665 Table S1: substrates and enzymes. All amino acids are in the L stereoconformation unless  
666 otherwise noted. AMC stands for 7-amido-4-methylcoumarin. N-(carboxylbenzyloxy-)  
667 (Z-) and tert-butyl (Boc) are blocking groups which prevent hydrolysis by  
668 aminopeptidases due to steric hindrance. Enzymes assayed are listed as “putative”  
669 because the enzyme listed shows maximal activity towards the listed substrate, but it is  
670 possible (and in some cases very likely) that other enzymes also hydrolyze the listed  
671 substrate. None of the peptidases in the E.C. database preferentially hydrolyze N-terminal  
672 glycine, ornithine, or phenylalanine, so no E.C. numbers are listed for Gly-AMC, Orn-  
673 AMC or L-Phe-AMC, although many peptidases likely exhibit secondary activity  
674 towards those residues.

| Substrate           | Abbreviation    | Putative enzyme assayed                                 | E.C. number         |
|---------------------|-----------------|---------------------------------------------------------|---------------------|
| Ala-Ala-Phe-AMC     | AAF-AMC         | subtilisin                                              | 3.4.21.62           |
| Arg-AMC             | Arg-AMC         | Aminopeptidase B                                        | 3.4.11.6            |
| Gly-AMC             | Gly-AMC         | Peptidases that preferentially hydrolyze N-terminal Gly | n/a                 |
| Gly-Gly-Arg-AMC     | Gly-Gly-Arg-AMC | trypsin                                                 | 3.4.21.4            |
| Leu-AMC             | Leu-AMC         | leucyl aminopeptidase                                   | 3.4.11.1, 3.4.11.10 |
| Ornithine-AMC       | Orn-AMC         | Peptidases that preferentially hydrolyze N-terminal Orn | n/a                 |
| D-Phe-AMC           | D-Phe-AMC       | D-stereospecific aminopeptidase                         | 3.4.11.19           |
| L-Phe               | L-Phe-AMC       | Peptidases that preferentially hydrolyze N-terminal Phe | n/a                 |
| Z-Phe-Arg-AMC       | Z-FR-AMC        | gingipain R                                             | 3.4.22.37           |
| Z-Phe-Val-Arg-AMC   | Z-FVR-AMC       | clostripain                                             | 3.4.22.8            |
| boc-Val-Pro-Arg-AMC | Boc-VPR-AMC     | trypsin                                                 | 3.4.21.4            |



676

677 Table S2: Sources for metagenomic data

| Site            | IMG Genome ID | Genome size | Gene count |
|-----------------|---------------|-------------|------------|
| White Oak River | 3300001751    | 8247658995  | 43518175   |
| White Oak River | 3300001753    | 10609117402 | 52065549   |
| White Oak River | 3300001706    | 7116721444  | 34096044   |
| White Oak River | 3300002053    | 799007063   | 857807     |

678

679 Table S3: called signal peptidases by gene, depth, and prediction algorithm.

680 Fig. S1: Cell abundance and porewater methane and sulfate concentrations.

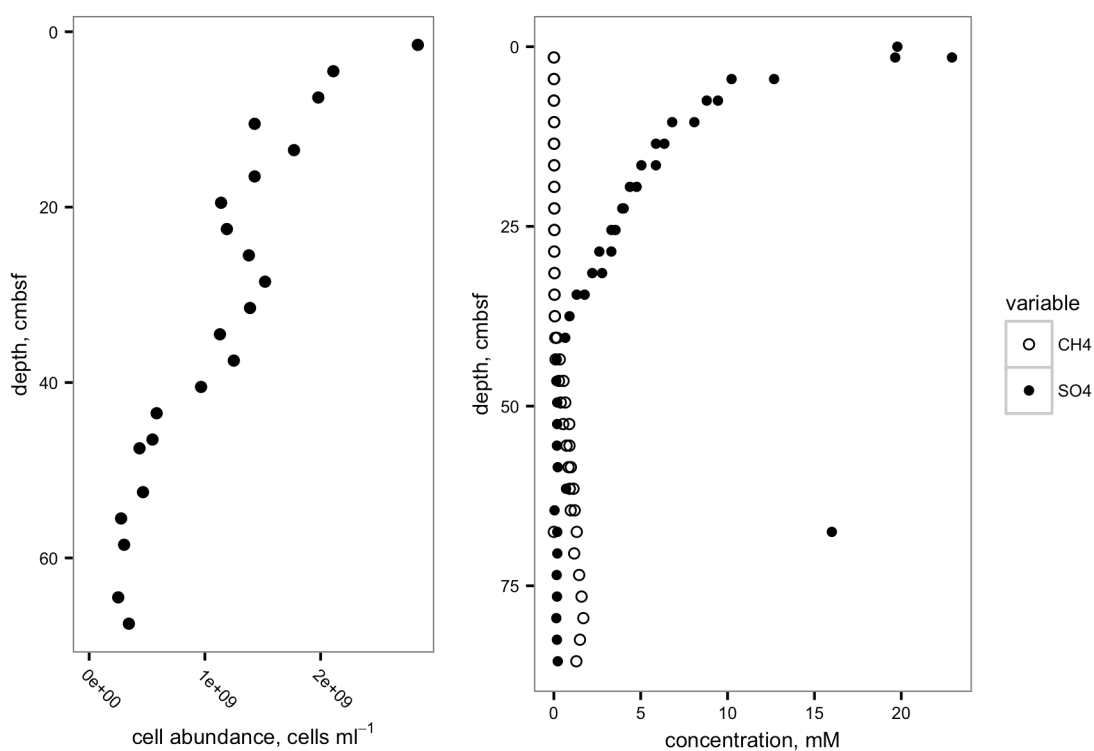

681

682

683

684

685 Fig S2a: Full saturation curves from 2013, using the Quantifluor ST fluorescence  
686 detector.

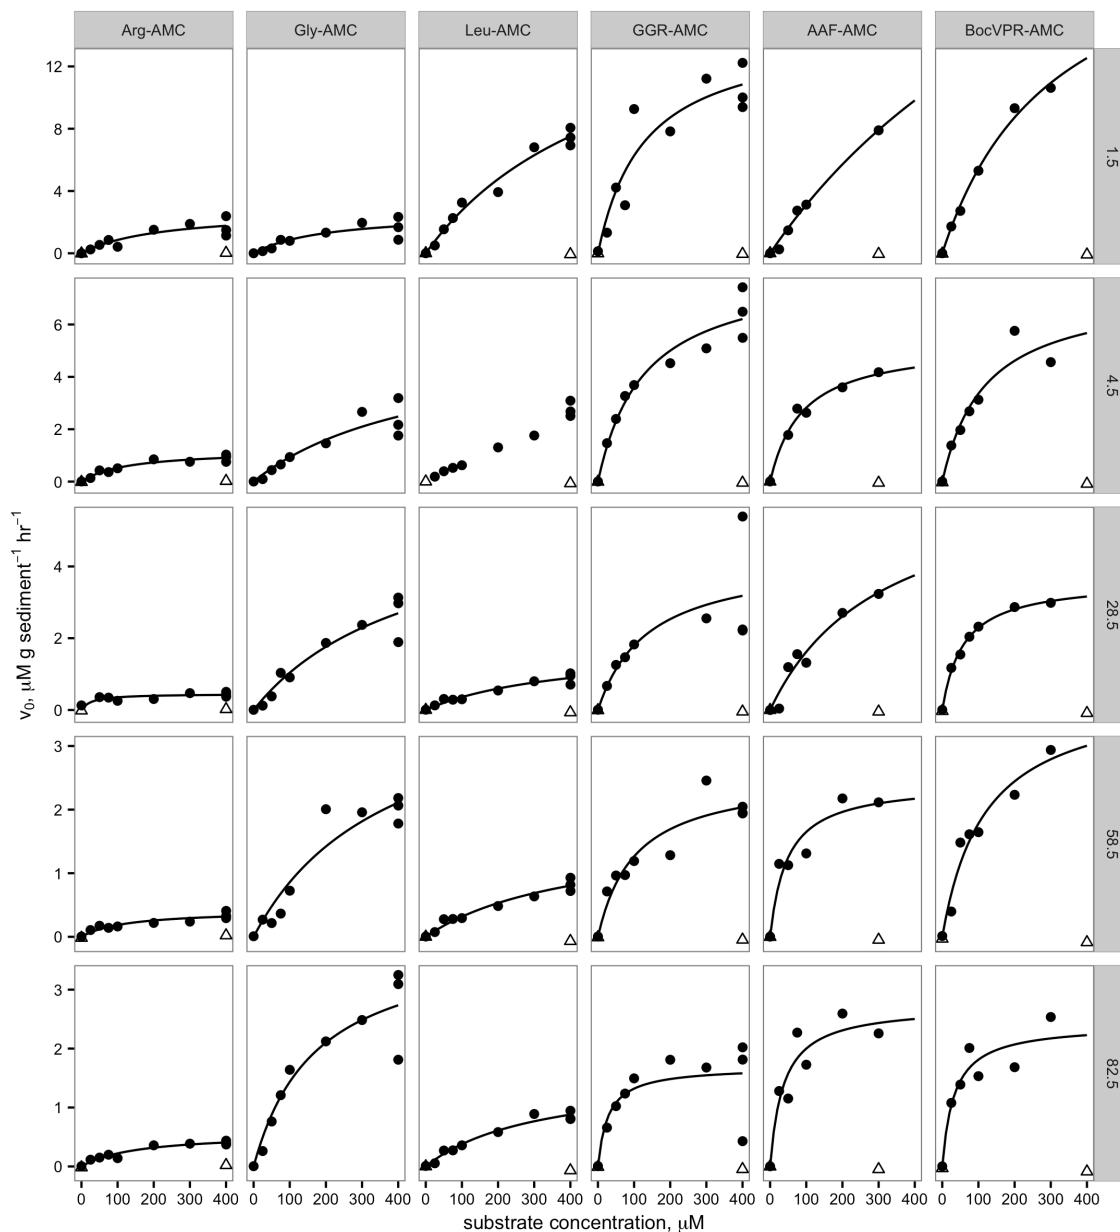

687  
688  
689  
690

691 Fig S2b: Saturation curves from 2014, taken using the microplate reader method.

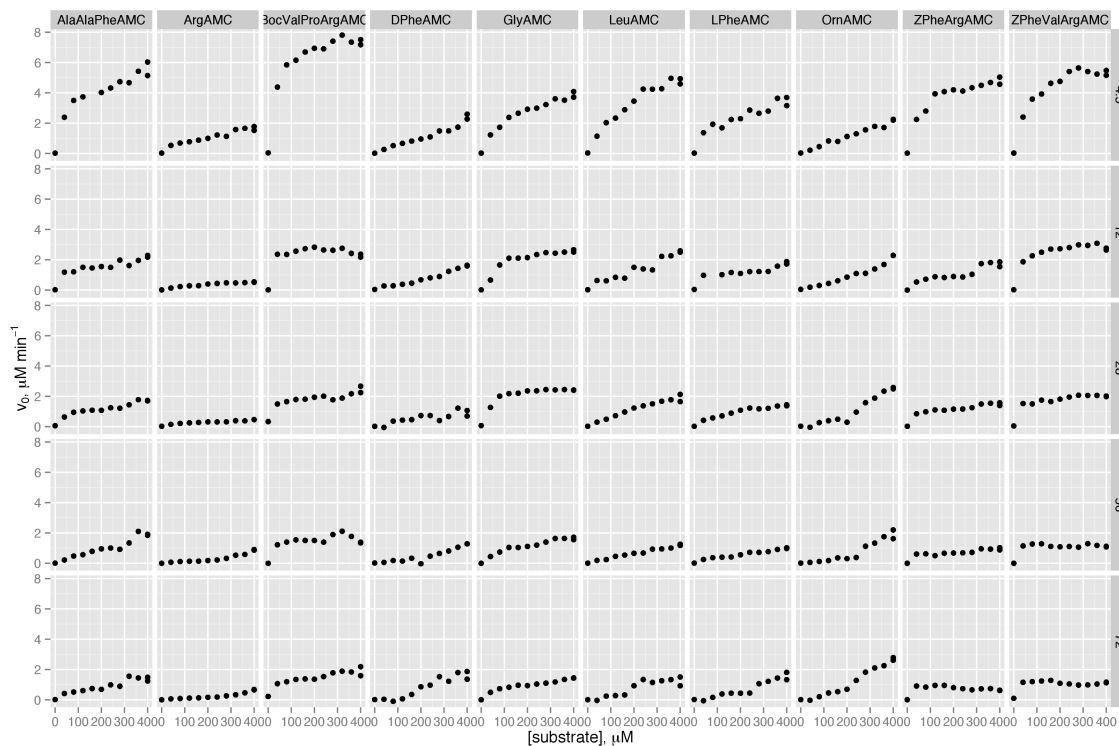

692

693

694

695 Fig S3:  $K_m$  values as a function of depth. Error bars represent the standard error of the  
696 nonlinear least squares estimate of  $K_m$ .

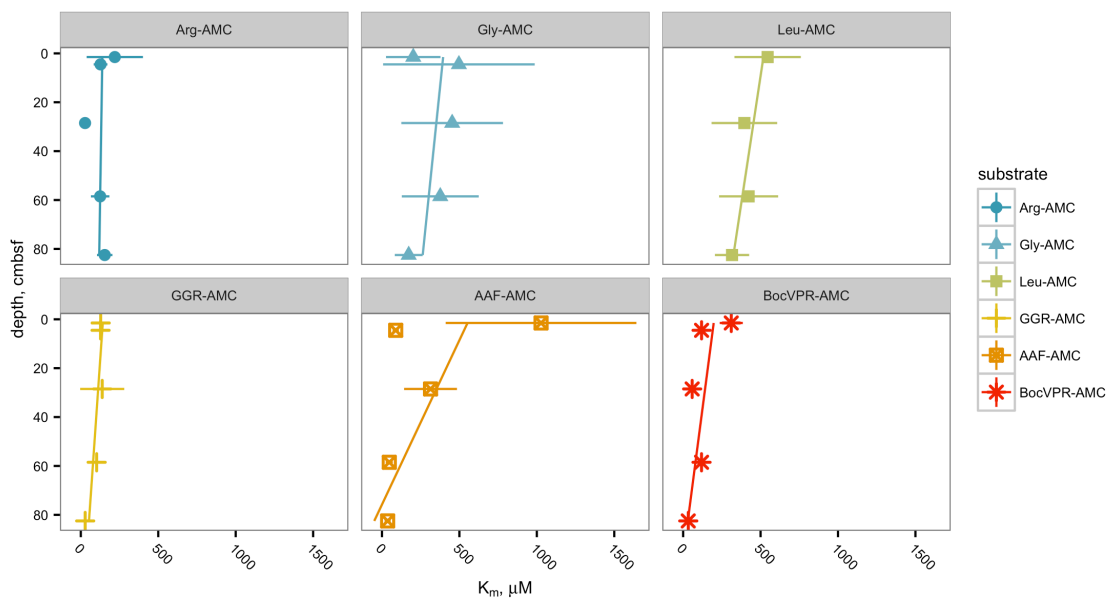

697



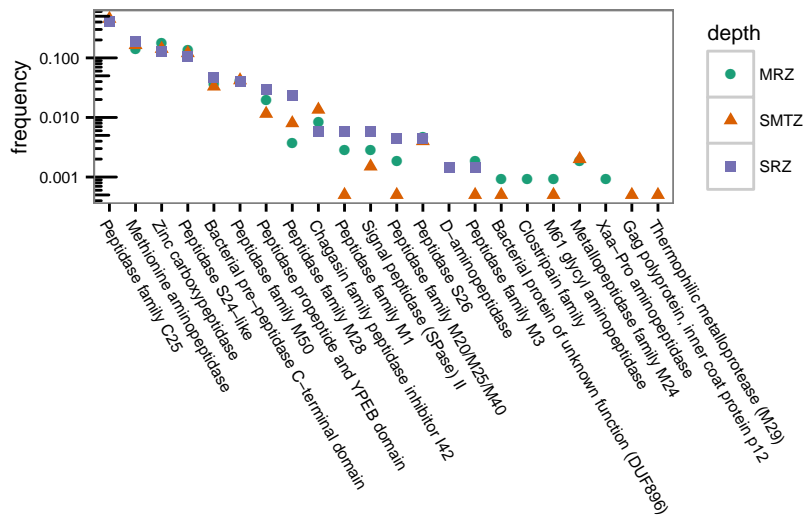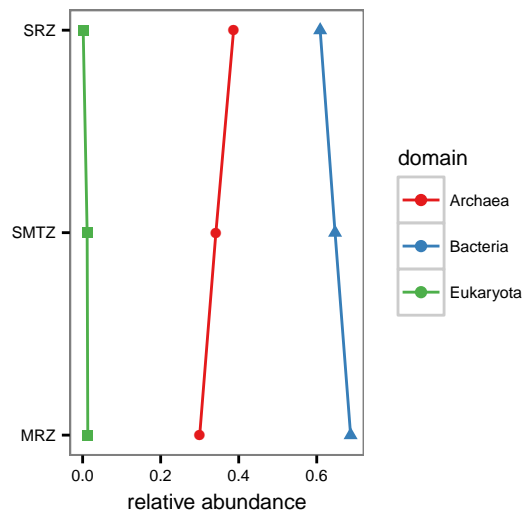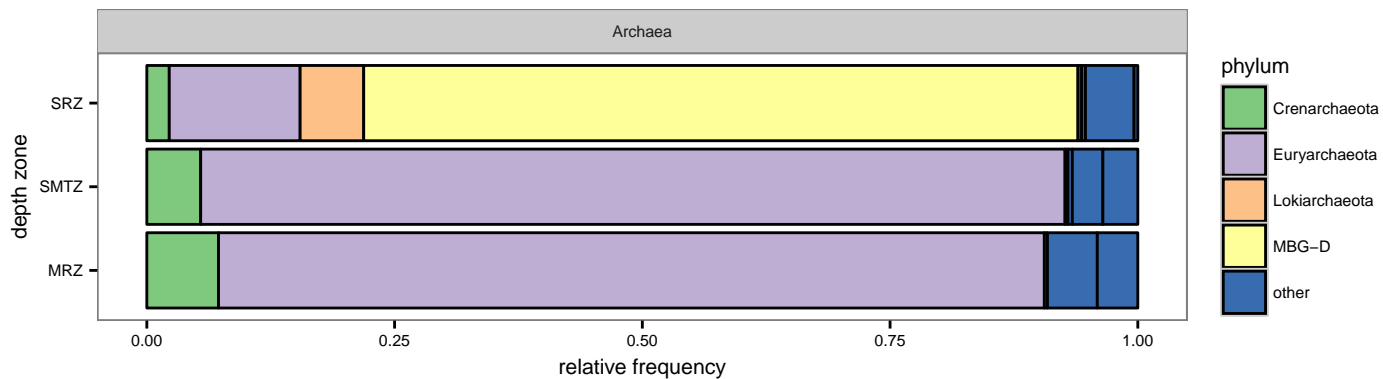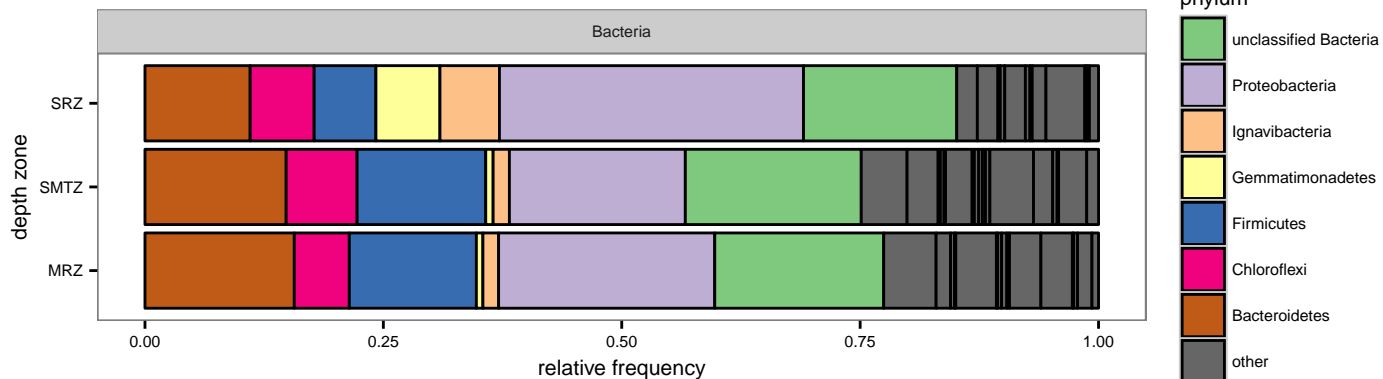

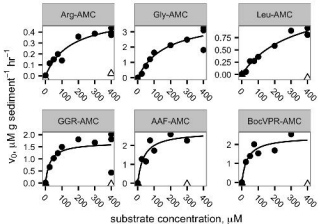

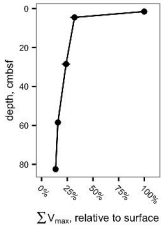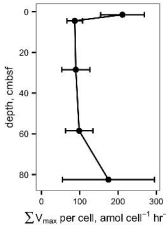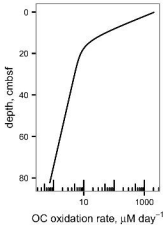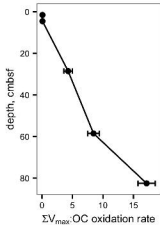



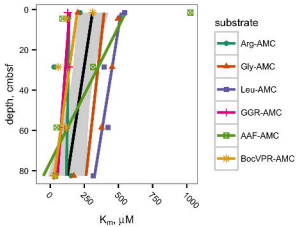

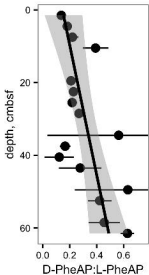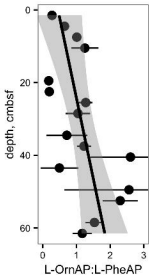

Source: https://www.biorxiv.org/content/10.1101/080671v1.full.pdf
