1 Kinetics and identities of extracellular peptidases in subsurface sediments of the White  
2 Oak River Estuary, NC

3

4 Running title: Extracellular enzymes in subsurface sediments

5

6 Andrew D. Steen<sup>a,#</sup>, Richard T. Kevorkian<sup>b</sup>, Jordan T. Bird<sup>b</sup>, Nina Dombrowski<sup>c</sup>, Brett J.  
7 Baker<sup>c</sup>, Shane M. Hagen<sup>a</sup>, Katherine H. Mulligan<sup>a,d</sup>, Jenna M. Schmidt<sup>a</sup>,  
8 Austen T. Webber<sup>a</sup>, Marc J. Alperin<sup>e</sup>

9

10 <sup>a</sup>Department of Earth and Planetary Sciences, University of Tennessee, Knoxville,  
11 Tennessee, USA

12 <sup>b</sup>Department of Microbiology, University of Tennessee, Knoxville, Tennessee, USA

13 <sup>c</sup>Department of Marine Science, University of Texas-Austin, Marine Science Institute,  
14 Port Aransas, Texas, USA

15 <sup>d</sup>Department of Biology, University of North Carolina at Chapel Hill, Knoxville,  
16 Tennessee, USA

17 <sup>e</sup>Department of Marine Sciences, University of North Carolina at Chapel Hill, USA

18

19 <sup>#</sup>Corresponding author. email: [asteen1@utk.edu](mailto:asteen1@utk.edu)

20 mail: Strong Hall 601, 1621 Cumberland Avenue, Knoxville, TN 37996-1410

21 tel: (865) 974-4014, fax: (865) 974 2638

## 22 **Abstract**

23           Anoxic subsurface sediments contain communities of heterotrophic  
24 microorganisms that oxidize organic carbon at extraordinarily slow rates. In order to  
25 assess the mechanisms by which subsurface microorganisms access detrital sedimentary  
26 organic matter, we measured kinetics of a range of extracellular peptidases in anoxic  
27 sediments of the White Oak River estuary, NC. Nine distinct peptidase substrates were  
28 enzymatically hydrolyzed at all depths. Potential peptidase activities ( $V_{max}$ ) decreased  
29 with increasing sediment depth, although  $V_{max}$  expressed on a per cell basis was  
30 approximately the same at all depths. Half-saturation constants ( $K_m$ ) decreased with  
31 depth, indicating that subsurface enzymes are adapted to low substrate concentrations.  
32 Potential activities of extracellular peptidases acting on molecules that are enriched in  
33 degraded organic matter (D-phenylalanine and L-ornithine) increased relative to enzymes  
34 that act on L-phenylalanine, further suggesting microbial community adaptation to access  
35 degraded organic matter. Nineteen classes of exported peptidases were identified in  
36 genomic data from the same site, of which genes for class C25 (gingipain-like) peptidases  
37 represented more than 40% at each depth. Methionine aminopeptidases, zinc  
38 carboxypeptidases, and class S24-like peptidases, which are involved in single-stranded  
39 DNA repair, were also abundant. These results suggest a subsurface heterotrophic  
40 microbial community that primarily accesses low-quality detrital organic matter via a  
41 diverse suite of well-adapted extracellular enzymes.

42

43

44 IMPORTANCE

45           Burial of organic carbon in marine and estuarine sediments represents a long-term  
46 sink for atmospheric carbon dioxide. Globally, ~40% of organic carbon burial occurs in  
47 anoxic estuaries and deltaic systems. However, the ultimate controls on the amount of  
48 organic matter that is buried in sediments, versus oxidized into CO<sub>2</sub>, are poorly  
49 constrained. Here we used a combination of enzyme assays and metagenomic analysis to  
50 identify how subsurface microbial communities catalyze the first step of proteinaceous  
51 organic carbon degradation. Our results show that microbial communities in deeper  
52 sediments are adapted to access molecules characteristic of degraded organic matter,  
53 suggesting that those heterotrophs are adapted to life in the subsurface.

54

## 55 Introduction

56 A large fraction of the microorganisms in subsurface sediments are heterotrophs  
57 that metabolize aged, microbially altered organic matter (Lomstein *et al.*, 2009;  
58 Jørgensen and Marshall, 2016; Biddle *et al.*, 2006). These communities' metabolisms can  
59 be more than a million-fold more slower than cells in culture (Hoehler and Jørgensen,  
60 2013; Lomstein *et al.*, 2009). A recent meta-analysis showed that only about 12% of cells  
61 in marine sediments belonged to cultured species, while 27% belong to phyla that contain  
62 no cultured representatives (Lloyd *et al.*, 2018). Consequently, the mechanisms by which  
63 these microorganisms access detrital organic matter are poorly understood.

64 In surface environments, where carbon transformations are relatively rapid,  
65 heterotrophic microorganisms gain energy by metabolizing a combination of small  
66 molecules (<600-1000 Da), which can be taken up directly via general uptake porins  
67 (Benz and Bauer, 1988) and macromolecules, which must be broken down outside of the  
68 cell by extracellular enzymes. Most freshly-produced organic matter is macromolecular,  
69 and large molecules tend to be more bioavailable than small ones (Benner and Amon,  
70 2015), so the nature and activity of extracellular enzymes present in surface environments  
71 is a major control on the rate of microbial carbon oxidation in such environments.

72 It is not clear whether microbial extracellular enzymes play the same role in  
73 subsurface sediments. It is conceivable that macromolecules are broken down primarily  
74 by non-enzymatic mechanisms in sediments. For instance, in soils, MnO<sub>4</sub> catalyzes the  
75 depolymerization of proteins without requiring enzymes. Certain bacterial species can  
76 use TonB-dependant transporters to transport polysaccharides that are substantially larger

77 than 600 Da into the periplasm (although enzymatic hydrolysis is still required prior to  
78 uptake into the cytoplasm; Reintjes *et al.*, 2017). Furthermore, some of the unique aspects  
79 of subsurface sediments suggest that extracellular enzymes might not be an effective  
80 strategy to obtain carbon or energy. In order for the production of extracellular enzymes  
81 to be part of a viable metabolic strategy, each enzyme must, over its lifetime, provide the  
82 cell with at least as much carbon or energy as was required to synthesize the enzyme  
83 (Vetter *et al.*, 1998; Allison, 2005; Schimel and Weintraub, 2003). In subsurface  
84 sediments, where cell division times may be on the order of decades to millenia, enzyme  
85 lifetimes would need to be correspondingly longer to remain ‘profitable’. Since enzyme  
86 lifetimes are finite, there must exist a community metabolic rate below which  
87 extracellular enzyme lifetimes are too short to become profitable. That limit is difficult to  
88 quantify because enzyme lifetimes in any environment are poorly constrained (e.g., Steen  
89 and Arnosti, 2011). Thus, it is plausible that extracellular enzyme-mediated carbon  
90 acquisition is impractical in sediments in which metabolic rates are particularly slow.

91 While extracellular enzyme activity in surface sediments has frequently been  
92 reported, few reports exist of extracellular enzyme activity from deeper than 20 cm below  
93 the seafloor (cmbsf) (Arnosti *et al.*, 2014). Enzyme activity has been reported in  
94 sapropels up to 389 cmbsf in sapropels in the Eastern Mediterranean Sea (Coolen and  
95 Overmann, 2000; Coolen *et al.*, 2002) and in sediment from 600-630 cmbsf in Aarhus  
96 Bay sediments (Lloyd *et al.*, 2013a), as well as in a few other subsurface environments,  
97 such as the interior of seafloor basalts at the Loihi seamount (Jacobson Meyers *et al.*,  
98 2014). Furthermore, an analysis of transcriptomes from subsurface sediments of the Peru

99 Margin revealed diverse exported peptidases and carbohydrate-active enzymes, which  
100 decreased in relative abundance with increasing depth (Orsi *et al.*, 2018).

101 In order to better understand how heterotrophic microorganisms in subsurface  
102 sediments access organic matter, we assayed a diverse set of peptidases (protein-  
103 degrading enzymes) in sediment cores from the White Oak River estuary, NC. We paired  
104 these assays with analysis of the potential for extracellular peptidase production from  
105 existing metagenomic data sets. We chose this site because the porewater geochemistry  
106 and microbiology of these sediments has been well-characterized (Martens and  
107 Goldhaber, 1978; Kelley *et al.*, 1990; Baker *et al.*, 2015; Lazar *et al.*, 2016; Lloyd *et al.*,  
108 2011) and because they contain abundant Bathyarchaeota and Thermopfundales  
109 archaea, which appear to be capable of metabolizing detrital organic matter (Kubo *et al.*,  
110 2012; Lloyd *et al.*, 2013a; Meng *et al.*, 2014; Zhou *et al.*, 2018b). We focused on  
111 peptidases because protein degradation appears to be an important metabolism for some  
112 subsurface archaea (Lloyd *et al.*, 2013a) and because peptidases were more active than  
113 other enzymes in similar environments (Coolen and Overmann, 2000; Jacobson Meyers  
114 *et al.*, 2014). Because environmental samples contain a wide range of distinct peptidases  
115 at variable activities (Obayashi and Suzuki, 2005; Steen and Arnosti, 2013) we measured

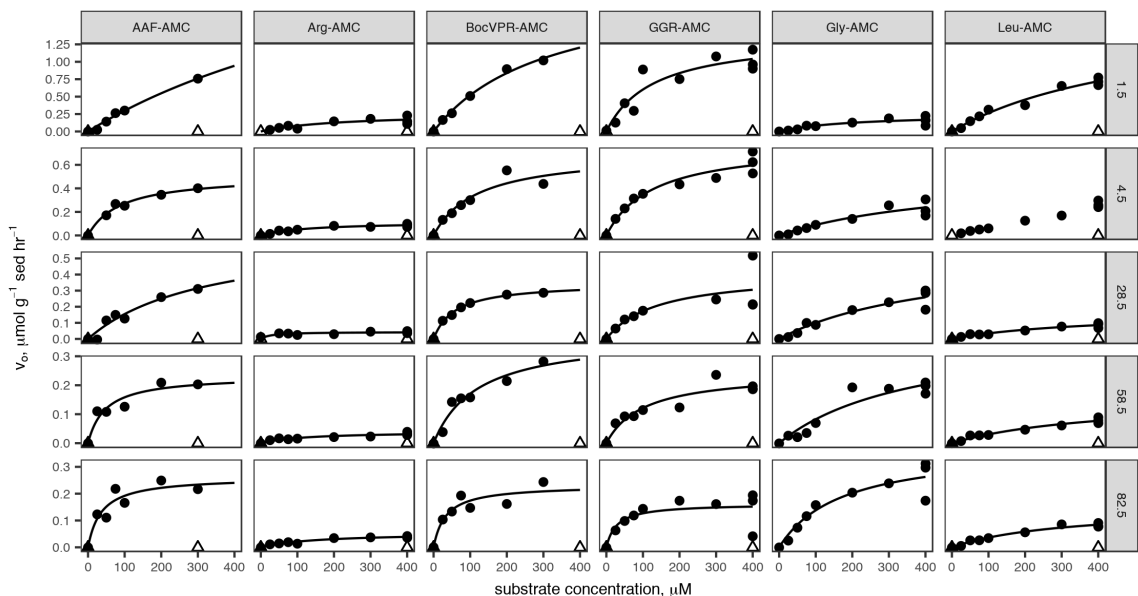

Figure 1: Saturation curves for six substrates measured using the single-cuvette reader methodology at each of six depths. Dark circles indicate “live” samples, open triangles indicate autoclaved controls. Dark lines indicate nonlinear least-squares fits to the Michaelis-Menten rate law. Substrate abbreviations are given in the column headings and are defined in Table 1. Sediment depths are listed on row headings in centimeters below sediment-water interface.

116 the hydrolysis of eleven different substrates, which may be hydrolyzed by structurally  
 117 and genetically diverse extracellular peptidases.

## 118 Results

### 119 PEPTIDASE KINETICS

120 Combining data from all three sampling dates, unambiguous hydrolysis of eleven  
 121 different peptidase substrates was observed. All peptidase substrates assayed with the  
 122 more-sensitive single-cuvette methodology were hydrolyzed much faster in untreated  
 123 sediments than in autoclaved controls. Kinetics of substrate hydrolysis were qualitatively

124 consistent with the Michaelis-Menten rate law,  $v_0 = \frac{V_{max} \times [S]}{K_m + [S]}$  (Fig 1). Estimated  $V_{max}$   
 125 values ranged from 40 to 3400 nmol g<sup>-1</sup> sediment hr<sup>-1</sup> (median 310, interquartile range

126 190 to 560 nmol g<sup>-1</sup> sediment hr<sup>-1</sup>). Throughout the core, AAF-AMC, GGR-AMC, and  
127 Gly-AMC were hydrolyzed the fastest, and Arg-AMC was hydrolyzed slowest (Fig S1).  
128 Summed  $V_{max}$  values decreased with depth from 9.09  $\mu\text{mol AMC g}^{-1}$  sed hr<sup>-1</sup> at the  
129 surface to 1.24  $\mu\text{mol AMC g}^{-1}$  sed hr<sup>-1</sup>, or 13% of the surface value, at 82.5 cmbsf.  
130 Estimated  $K_m$  values ranged from 36.1  $\mu\text{M}$  to 1310  $\mu\text{M}$  (median 138  $\mu\text{M}$ , interquartile  
131 range 102 to 326  $\mu\text{M}$ ), and trended downward (i.e., to greater substrate affinity) with  
132 increasing depth (Fig 2).  $K_m$  values for hydrolysis of Leu-AMC were the greatest (i.e.,  
133 lowest substrate affinity) while  $K_m$  values for hydrolysis of BocVPR-AMC, GGR-AMC,  
134 and Arg-AMC were the least.

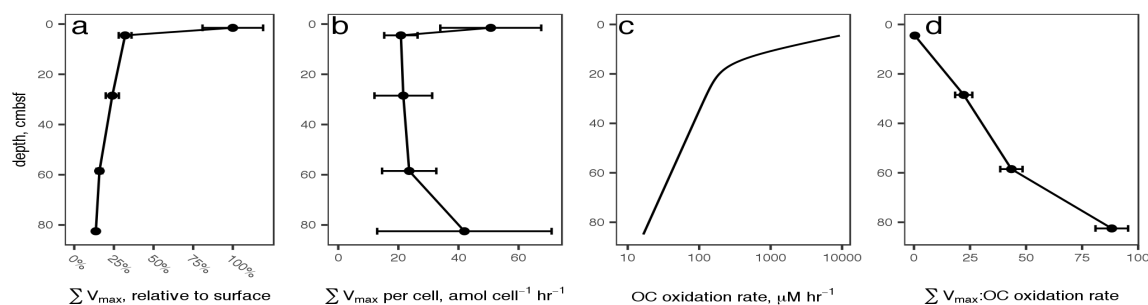

Figure 2: A: The sum of all peptidase  $V_{max}$  values, relative to the value at 4.5 cm, versus sediment depth. Error bars represent propagated error of the estimate of  $V_{max}$  for each substrate. B: Summed  $V_{max}$  relative to cell count. Error bars represent propagated error from summed  $V_{max}$  and cell counts, and is dominated by cell count uncertainty. C: Organic carbon oxidation rates modeled from sulfate and methane profiles. D: Summed  $V_{max}$  relative to modeled carbon oxidation rates. Error bars represent error in summed  $V_{max}$  relative to organic carbon oxidation rates, for which uncertainty was not modeled.

135 In a separate core, hydrolysis rates of D-Phe-AMC, L-Phe-AMC, and L-Orn-  
136 AMC were assessed. These were measured using a plate-reader technique that proved  
137 insufficiently precise to accurately measure  $V_{max}$  or  $K_m$ , so we have only reported  $v_0$ ,  
138 which was measured at a high substrate concentration (400  $\mu\text{M}$ ) and therefore



139 approximates  $V_{max}$ . Ratios of  $v_0$  for D-Phe-AMC : L-Phe-AMC hydrolysis and L-Orn-  
140 AMC : L-Phe-AMC hydrolysis rates increased approximately linearly downcore (Fig 3).

141 MICROBIAL ABUNDANCE, CELL-SPECIFIC PEPTIDASE ACTIVITY, AND ORGANIC  
142 CARBON OXIDATION RATES

143 Concordantly with potential activities, cell counts decreased more-or-less steadily  
144 downcore from  $4.5 \times 10^8$  cells ml<sup>-1</sup> wet sediment at 1.5 cmbsf to  $7.4 \times 10^7$  cells ml<sup>-1</sup> wet  
145 sediment at 82.5 cmbsf. Consequently, cell-specific total potential peptidase activity was  
146 roughly constant at 32 +/- 14 amol AMC cell<sup>-1</sup> hr<sup>-1</sup> (Fig 2b) with no significant trend as a  
147 function of depth. Most of the error in cell-specific peptidase activities results from  
148 variance in cell counts rather than in  $V_{max}$  estimations.

149 Organic carbon oxidation rates were estimated using a 2-G model driven by  
150 porewater methane and sulfate concentrations. The total organic carbon oxidation rate at

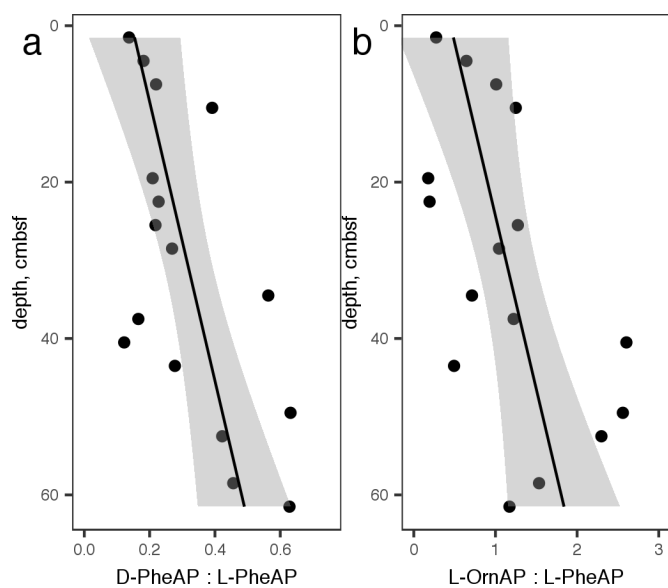

Figure 3: a.) Ratio of  $v_0$  for D-phenylalanine aminopeptidase: L-phenylalanine aminopeptidase and b.) L-ornithine aminopeptidase: L-phenylalanine aminopeptidase.

82.5 cmbsf was approximately  
0.17% relative to that at 4.5 cmbsf  
(the top of the model domain), a  
decrease of almost 3 orders of  
magnitude (Fig 2c). Thus, summed  
 $V_{max}$  relative to  $G$  increased more  
than 200-fold in the deepest  
sediments relative to surface  
sediments.

160 PEPTIDASE GENES

161 Samples for genomic analysis were taken from three broad sedimentary zones: the

162 sulfate reduction zone (SRZ, 8-12 cmbsf), sulfate-methane transition zone (SMTZ, two

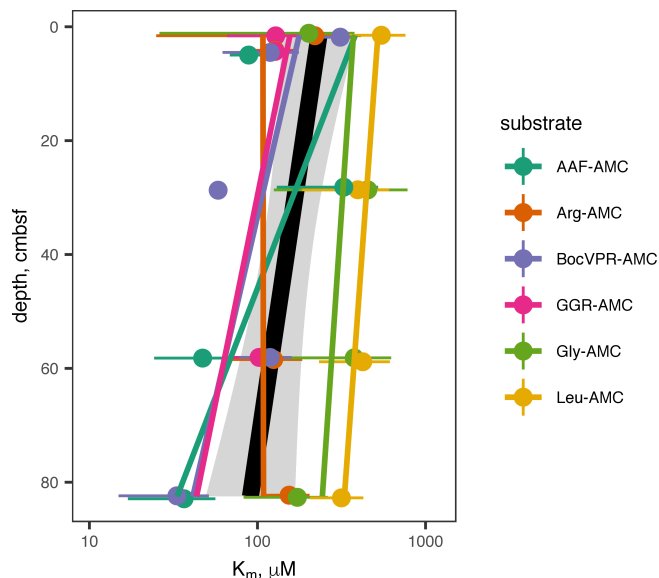

Figure 4:  $K_m$  values of extracellular peptidases as a function of depth. Details of substrates and the peptidases they correspond to are in Table 1.

distinct samples from nearby locations,

24-32 cmbsf and 26-30 cmbsf), and the

methane-rich zone (52-54 cmbsf; data

originally published in Baker *et al.*,

2015). A total of 3739 genes encoding

extracellular peptidases were identified

among metagenomes from the three

depth zones examined, including 685

from SRZ, 1994 from SMTZ, and 1060

172 from MRZ. Of the genes encoding for

173 peptidases, 0-71% (depending on class of peptidase, algorithm and sediment depth)

174 contained a signal peptide and are likely secreted by the SEC-dependent transport system

175 (supplementary data). Among the genes associated with signal peptides, members of

176 peptidase family C25, belonging to the gingipain family, were by far the most abundant

177 at all depths, accounting for 41-45% of all SP-associated peptidases (Fig. 4). Genes

178 annotated as encoding extracellular methionine aminopeptidases and zinc

179 carboxypeptidases were also abundant (13%-19%). Together, these peptidase classes

180 accounted for 73%, 76%, and 73% of exported peptidases in the SRZ, SMTZ, and MRZ

181 respectively. The composition of protein families was generally consistent with depth,

182 particularly among the more-abundant peptidases. Five peptidase annotations were an  
 183 exception to this trend: peptidase family M1, peptidase family M20/M25/M40, peptidase  
 184 family M3, M61 glycyl aminopeptidase, and thermophilic metalloprotease (M29) were  
 185 found in much lower abundance at the SMTZ than the MRZ or SRZ. Given that those  
 186 correspond to differences of one or a few total reads, these are well within the range of  
 187 noise.

## 188 Discussion

### 189 IDENTITIES OF EXTRACELLULAR PEPTIDASES PRESENT IN WHITE OAK RIVER

#### 190 ESTUARY SEDIMENTS

191 Kinetics of fluorogenic substrate hydrolysis was consistent with the Michaelis-

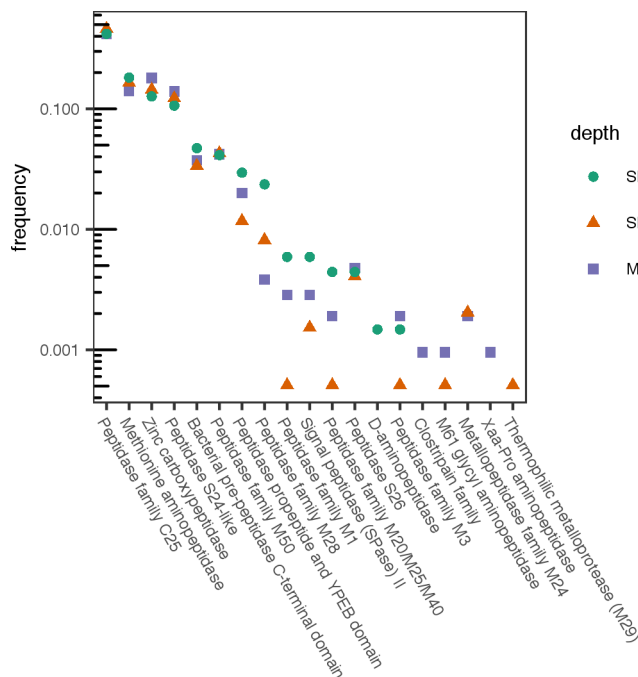

Figure 5: Exported peptidases identified in WOR sediments. Depths SRZ, SMTZ, and MRZ correspond to the sulfate-reducing zone (8-12 cmbsf), sulfate-methane transition zone (24-32 cmbsf) and methane-rich zone (52-54 cmbsf), respectively.

Menten rate law and hydrolysis rates were dramatically slower in autoclaved controls than in “live” treatments, indicating that the substrates were hydrolyzed by enzymes rather than by abiotic factors. The enzyme substrates used here encompassed a diverse range of amino acid and peptide chemistries, including polar and non-polar R groups at the P1 site (i.e., the amino

203 acid N-terminal to the scissile bond) and substrates with and without steric protecting  
204 groups, which must have been hydrolyzed by endopeptidases (which cleave proteins from  
205 within) and aminopeptidases (which cleave proteins from the N terminus) respectively.  
206 Peptide bonds adjacent to a diverse set of amino acid residues were cleaved, including  
207 glycine (the smallest amino acid), phenylalanine (among the largest amino acids),  
208 arginine (positively charged at porewater pH) and leucine (uncharged, hydrophobic),  
209 consistent with the presence of a diverse range of extracellular peptidases throughout the  
210 core.

211 The metagenomic results also indicated the potential for a diverse range of  
212 secreted peptidases, produced by a broad range of taxa, throughout the sediment column.  
213 The metagenomic results represent a minimum estimate for the genomic potential for  
214 extracellular peptidase production, because they rely on the assumption that only those  
215 peptidases associated with signal peptides (SPs) are secreted. Non-SP-based enzyme  
216 secretion pathways may also contribute to the pool of extracellular enzymes, including  
217 Sec-independent secretion systems (Bendtsen *et al.*, 2005) and release of internal  
218 enzymes into the extracellular medium by viral lysis (Danovaro *et al.*, 2008; Breitbart *et*  
219 *al.*, 2004).

220 The dominance of genes for exported gingipain-like endopeptidases (class C25) at  
221 all depths is consistent with rapid hydrolysis rates of fluorogenic substrates for  
222 endopeptidases. Gingipains are endopeptidases with preference for arginine at the P1  
223 position (i.e., the N-terminal side of the hydrolyzed bond), which would be active  
224 towards the substrates GGR-AMC and Boc-VPR-AMC. Those were among the fastest-

225 hydrolyzed substrates at each depth (Fig. 1), indicating that genes for C25 peptidases  
226 were likely expressed. Previously, gingipains have been identified in Thermopfundales  
227 (formerly Marine Benthic Group D) and in Bathyarchaeota, and appear to be widespread  
228 in marine sediments (Zhou *et al.*, 2018a; Lloyd *et al.*, 2013b; Orsi *et al.*, 2018). The M28  
229 family, also among the most abundant annotations, contains a diverse range of  
230 aminopeptidases and carboxypeptidases including leucine aminopeptidase, consistent  
231 with the observed hydrolysis of Leu-AMC (Rawlings *et al.*, 2018). Genes for D-  
232 aminopeptidases genes were observed, consistent with hydrolysis of D-Phe-AMC.

233 Other abundant genes were annotated as methionine aminopeptidase, zinc  
234 carboxypeptidase, a C-terminal domain from bacterial pre-peptidases, and peptidases  
235 from the MEROPS families M24, S24, M50, and M28. Potential activities of these  
236 peptidases were not assayed. Zinc carboxypeptidases (M20) cleave enzymes from the  
237 carboxy-terminus and have strong specificity for Gly at the P1 position (i.e., the position  
238 C-terminal to the scissile bond), but little preference for the residue at the P1' position  
239 (the position C-terminal to the scissile bond; in a carboxypeptidase this would be the C-  
240 terminus of the protein). Methionine aminopeptidases (M24) are metallopeptidases with  
241 preference for glycine at the P1 position.

242 S24 and M50 peptidases are less likely to be directly relevant to organic matter  
243 processing. S24 peptidases are involved in the SOS response for single-stranded DNA  
244 repair (Rawlings *et al.*, 2018). M50 peptidases are membrane-bound enzymes that act as  
245 sporulation factors in *Bacillus subtilis*, and possibly other Bacteria (Green and Cutting,  
246 2000; Feng *et al.*, 2007), and which are not secreted. However, DNA repair (Orsi *et al.*,

247 2013; Bird *et al.*) and spore formation (O’Sullivan *et al.*, 2015; Lomstein *et al.*, 2012)  
248 both appear to be important survival mechanisms for microorganisms in subsurface  
249 sediments. The bacterial C-terminal pre-peptidase domain is often found in secreted  
250 peptidases, but is removed prior the peptidase becoming active, and could be associated  
251 with a wide range of peptidases (Yeats *et al.*, 2003).

252         Each of these annotations is plausible in terms of what is known about peptidase  
253 activities in sediments, and the annotations and observed activities generally agreed with  
254 each other. We did not assay for carboxypeptidases (e.g. MEROPS family M20) or  
255 methionine aminopeptidase, but carboxypeptidases have previously been observed to be  
256 active in estuarine sediments (Pantoja *et al.*, 1997) and the generally broad substrate  
257 specificities of extracellular aminopeptidases suggests that methionine aminopeptidases  
258 could have contributed to the hydrolysis of the other aminopeptidase substrates (Steen *et*  
259 *al.*, 2015). However, a note of caution is also warranted when interpreting peptidase  
260 annotations from deeply branching microorganisms: the high diversity of hydrolases  
261 makes precise annotations difficult, and the exact substrate specificities of the peptidases  
262 in these samples may differ somewhat from those inferred from the annotations  
263 (Michalska *et al.*, 2015). Thus, while these annotations are environmentally plausible and  
264 generally consistent with the fluorogenic enzyme assays, they should nevertheless be  
265 viewed with some skepticism.

266 PEPTIDASE KINETICS SUGGEST ADAPTAION OF SUBSURFACE PEPTIDASES TO  
267 DEGRADED ORGANIC MATTER

268 Heterotrophic microorganisms in subsurface sediments have little access to fresh  
269 organic matter. In the cores described here, which represented ~275 years of sediment  
270 deposition, organic matter reactivity decreased by at least three orders of magnitude  
271 between the surface and 82.5 cmbsf (Fig 2c). It is challenging to determine what fraction  
272 of high- vs low-molecular weight organic matter subsurface microorganisms metabolize.  
273 However, the fact that cell-specific  $V_{max}$  was more-or-less constant downcore (Fig 2b)  
274 suggests that the heterotrophic community relied on complex organic matter to a similar  
275 degree at all depths. The cell-specific  $V_{max}$  values for Leu-AMC hydrolysis, 21-51 amol  
276 cell<sup>-1</sup> hr<sup>-1</sup>, are comparable to previous measurements in active environments such as  
277 surface sediments (2-100 amol cell<sup>-1</sup> hr<sup>-1</sup>) and seawater ( mostly less than 100 amol cell<sup>-1</sup>  
278 hr<sup>-1</sup>, but with some measurements up to 10 nmol cell<sup>-1</sup> hr<sup>-1</sup>; Vetter and Deming, 1994 and  
279 references therein), consistent with communities that relied primarily on organic carbon  
280 derived from macromolecules.

281 The ratio of  $\Sigma V_{max}$  : OC oxidation rate is sensitive to the mix of enzymes included  
282 in the sum, and to the substrate specificity of enzymes assayed (some enzymes will be  
283 capable of hydrolyzing multiple substrates). The absolute value of that sum, therefore, is  
284 not particularly meaningful. The trend, however, is informative: as sediment depth  
285 increased, the potential activity of extracellular peptidases decreased much more slowly  
286 than the actual rate of organic carbon oxidation, so the ratio of  $\Sigma V_{max}$  : OC oxidation rate  
287 increased dramatically (Fig 2d).  $V_{max}$  is a proxy for enzyme concentration, so the

288 observed increase in  $\Sigma V_{max}$  : OC oxidation rate combined with the trend in cell-specific  
289  $\Sigma V_{max}$  suggests that deeper heterotrophic communities exhibited similar demand for  
290 detrital OM, but that those enzymes returned bioavailable hydrolysate at a much slower  
291 rate because substrate concentrations were lower.

292 The White Oak River subsurface communities were similar to their surface  
293 counterparts in terms of reliance on extracellular enzymes for bioavailable organic  
294 carbon, although subsurface metabolisms were considerably slower. However, enzyme  
295 kinetics and potential activities of D-phenylalanine aminopeptidase, L-phenylalanine  
296 aminopeptidase, and L-ornithine aminopeptidase all suggested microbial community  
297 adaptation to old, degraded organic matter in deeper sediments.

298 Most amino acids are biosynthesized as L-stereoisomers. As organic matter ages,  
299 the ratio of D-amino acids to L-amino acids (D:L ratio) increases with depth, due to  
300 abiotic racemization and increased abundance of D-amino acids derived from bacterial  
301 cell walls (Bada *et al.*, 1970; Lomstein *et al.*, 2009). Accordingly, the potential activity of  
302 D-phenylalanyl aminopeptidase increased relative to that of L-phenylalanyl  
303 aminopeptidase, indicating an increased capacity to access degraded organic matter.  
304 Ornithine, which is a product of the release of urea from arginine, is another marker for  
305 degraded organic matter, while phenylalanine is more characteristic of fresher organic  
306 matter (Dauwe *et al.*, 1999), and the relative potential activity of L-phenylalanine  
307 aminopeptidase : ornithine aminopeptidase followed the same increasing trend with  
308 depth. Finally, the decrease of  $K_m$  values with increasing depth indicates peptidases that  
309 function more efficiently at lower substrate concentrations. It is intuitive that the



310 concentration of enzyme-labile organic matter concentrations would decrease downcore,  
311 and the observed increase in  $\Sigma V_{max}$  : OC oxidation rate provides direct evidence of that.  
312 Taken together, these three observations provide strong evidence for a subsurface  
313 heterotrophic microbial community that is increasingly adapted to persist using degraded  
314 organic matter at increasing depth.

315 This evidence raises the ecological question of *how* selective pressure produces a  
316 heterotrophic community adapted to degraded organic matter. Modeling and genomic  
317 observations in other sedimentary environments suggest that microbial growth rates are  
318 too slow for community adaptation by enhanced growth rates of more successful taxa;  
319 rather, communities in deeper sediments consist of taxa that were deposited at the  
320 sediment-water interface and died at the slowest rates (Starnawski *et al.*, 2017; Bradley *et*  
321 *al.*, 2018). If those findings can be generalized to environments characterized by  
322 recalcitrant organic matter, that poses a question: in which aquatic environments are  
323 microorganisms capable gaining reproductive advantage by growing on recalcitrant  
324 organic carbon? The studies cited above addressed sites at which sedimentation rates,  
325 microbial respiration, and likely cell doubling times were considerably slower than in the  
326 sediments described here, so even if growth (as opposed to persistence) on recalcitrant  
327 organic carbon is not possible in those environments, it may have been in the White Oak  
328 River sediments. Alternately, microbial taxa may gain adaptations to metabolize  
329 recalcitrant organic matter in environments where labile organic matter is more abundant  
330 and growth rates are higher. This scenario would imply that organisms which primarily  
331 metabolize more labile organic matter would gain some selective advantage by also

332 metabolizing recalcitrant organic matter. Further analysis of the mechanisms by which  
333 subsurface heterotrophs access degraded sedimentary organic matter may yield insights  
334 into how microorganisms survive in low-energy environments, and into the controls on  
335 organic carbon preservation in sediments over geological timescales.

336

## 337 **Materials and Methods**

### 338 STUDY SITE

339 Samples were collected from Station H in the White Oak River Estuary, 34°  
340 44.490' N, 77° 07.44' W, first described by Gruebel and Martens (1984). The White Oak  
341 River Estuary occupies a drowned river valley in the coastal plain of North Carolina.  
342 Station H is characterized by salinity in the range of 10 to 28 and water depth on the  
343 order of 2 m. The flux of  $\Sigma\text{CO}_2$  across the sediment-water interface was  $0.46 \pm 0.02$   
344  $\text{mmol m}^{-2} \text{hr}^{-1}$  (measured in May of 1987), primarily due to organic carbon oxidation via  
345 sulfate reduction. The sediment accumulation rate averages  $0.3 \text{ cm yr}^{-1}$  (Kelley et al.,  
346 1990). Total organic carbon content is approximately 5%. For this study, push cores of  
347 40-85 cm were collected from Station H by swimmers on May 28, 2013, and October 22,  
348 2014. In 2013, cores were transported to the nearby Institute of Marine Sciences  
349 (University of North Carolina) at Morehead City, where they were sectioned and  
350 processed for enzyme activities, porewater geochemistry, and cell counts within 6 hours  
351 of sample collection. Porewater sulfate in 2013 was depleted by 43.5 cm, and methane  
352 peaked at 79.5 cm (Fig. S1). In 2014, cores were transported on the day of sampling to

353 the University of Tennessee, Knoxville, stored at 4 °C, and processed for enzyme  
354 activities the following day. Samples for metagenomic analysis were collected separately  
355 in October 2010 from three sites (sites 1, 2, and 3, as previously described by Baker et al.,  
356 2015), all of which are within 550 m of Station H.

#### 357 ENZYME ASSAYS

358 Enzyme assays were performed using different protocols in 2013 (data presented  
359 in Figs 1-3) versus 2014 (data presented in Fig 4). In 2013, enzyme assays were  
360 performed according to a protocol similar to the one described in Lloyd et al (2013b).  
361 Cores were sectioned into 3 cm intervals. The following intervals were selected for  
362 enzyme assays: 0-3 cm, 3-6 cm, 27-30 cm, 57-60 cm, and 81-83 cm. Each section was  
363 homogenized, and approximately 0.5 ml wet sediment was transferred into separate 5 ml  
364 amber glass serum vials, which had been pre-weighed and preloaded with 4 ml anoxic  
365 artificial seawater (Sigma Sea Salts, salinity = 15, pH=7.5) Samples were weighed again  
366 to determine the precise mass of wet sediment added, and then an appropriate quantity of  
367 20 mM peptidase substrate stock dissolved in DMSO was added, up to 90 µL, for final  
368 substrate concentrations of 0, 25, 50, 75, 100, 200, or 300 µM. Substrates are listed in  
369 Table 1. Triplicate incubations with 400 µM Arg-AMC, Gly-AMC, Leu-AMC and Gly-  
370 Gly-Arg-AMC were also created, but these were omitted for Ala-Ala-Phe-AMC and Boc-  
371 Phe-Val-Arg-AMC because the latter two substrates are considerably more expensive.  
372 Each serum vial was vortexed, briefly gassed with N<sub>2</sub> to remove oxygen introduced with  
373 the sample, and approximately 1.3 ml slurry was immediately removed, transferred to a  
374 microcentrifuge tube, and placed on ice to quench the reaction. The precise time of

375 quenching was recorded. This was centrifuged at  $10,000 \times g$  within approximately 15  
376 minutes. The supernatant was transferred to a methacrylate cuvette and fluorescence was  
377 measured with a Turner Biosystems TBS-380 fluorescence detector set to UV mode  
378 ( $\lambda_{\text{ex}}=365\text{-}395$  nm,  $\lambda_{\text{em}}=465\text{-}485$  nm). Samples were then incubated at  $16^\circ\text{C}$ ,  
379 approximately the *in situ* temperature, and the sampling procedure was repeated after  
380 approximately 3 hours. The rate of fluorescence production was calculated as the increase  
381 in fluorescence for each sample divided by the elapsed time between sample quenching.  
382 Killed controls were made using homogenized, autoclaved sediments from 35-45 cmbsf.  
383 However, we note that autoclaving does not completely destroy sediment enzymes  
384 because sorption to mineral surfaces stabilizes enzyme structure, vastly increasing their  
385 ability to maintain a functional conformation at high temperatures (Stursova and  
386 Sinsabaugh, 2008; Carter *et al.*, 2007; Schmidt, 2016). We therefore used the autoclaved  
387 samples as a qualitative control for the null hypothesis that enzymes were responsible for  
388 none of the observed substrate hydrolysis, rather than as a quantitative method to  
389 distinguish enzymatic substrate hydrolysis from potential abiotic effects. In some  
390 sediments, a large fraction of fluorophore can sorb to particles, requiring a correction to  
391 observed fluorescence (Coolen *et al.*, 2002; Coolen and Overmann, 2000), but we  
392 observed negligible sorption of fluorophore to the White Oak River sediments.

393 In 2014, enzymes were assayed using a protocol based on the approach of Bell et  
394 al (2013), which was designed for soil enzyme assays. In this approach, peptidase  
395 substrates were mixed with sediment-buffer slurries in 2-mL wells of a deep-well plate.  
396 These plates were periodically centrifuged and 250  $\mu\text{L}$  aliquots of supernatant were

397 transferred into a black 96-well microplate. Fluorescence was read using a BioTek  
398 Cytation 3 microplate reader ( $\lambda_{\text{ex}} = 360 \text{ nm}$ ,  $\lambda_{\text{em}} = 440 \text{ nm}$ ). Results from this method  
399 proved considerably noisier than the single-cuvette method used in 2013, so kinetic  
400 parameters ( $V_{\text{max}}$  and  $K_m$ ) were not calculated for these data. Nevertheless, results were  
401 qualitatively similar to those from 2013, and we have reported  $V_{\text{max}}$  from 2014 as  $v_0$   
402 measured at 400  $\mu\text{M}$  substrate concentration, which was saturating. In June 2014, the  
403 following substrates were assayed: AAF-AMC, Arg-AMC, Boc-VPR-AMC, D-Phe-  
404 AMC, Gly-AMC, Leu-AMC, L-Phe-AMC, Orn-AMC, Z-Phe-Arg-AMC, and Z-Phe-Val-  
405 Arg-AMC. In October 2014, L-Phe-AMC, D-Phe-AMC, and Orn-AMC were assayed  
406 according to the same protocol in 3-cm core sections at 1.5, 4.5, 7.5, 10.5, 19.5, 22.5,  
407 25.5, 28.5, 34.5, 37.5, 40.5, 43.5, 49.5, 52.5, 58.5, and 61.5 cmbsf.

408 Peptidase kinetic data were analyzed using R. All raw data and scripts related to  
409 enzyme analysis are posted at [http://github.com/adsteen/WOR\\_enz\\_2013\\_2014](http://github.com/adsteen/WOR_enz_2013_2014). For  
410 samples taken using the more sensitive single-cuvette method, Michaelis-Menten  
411 parameters were estimated from nonlinear least squares fits to kinetic data. In the case of  
412 Leu-AMC at 4.5 centimeters below seafloor, kinetic data could not successfully be fit to a  
413 Michaelis-Menten function, so no  $K_m$  was reported and the value of  $v_0$  at the highest  
414 substrate concentration was substituted for  $V_{\text{max}}$ . For analysis of correlations, data sets  
415 were qualitatively evaluated for homoskedasticity and normality of residuals using q-q  
416 plots and plots of residuals vs fitted values. When untransformed data met those criteria,  
417 the null hypothesis of no correlation was tested using linear least-squares regressions.  
418 When untransformed data failed to meet those criteria, data were first log-transformed. In

419 cases in which log-transformed data were wither heteroskedastic or residuals were non-  
420 normally distributed, data were rank-transformed and correlations were tested using  
421 Spearman's  $\rho$ .

422

## 423 GEOCHEMICAL AND MICROBIOLOGICAL MEASUREMENTS

424 Sediment porosity was measured by mass after drying at 80 °C, according to the  
425 equation

$$\phi = \frac{m_w / \rho_w}{m_w / \rho_w + \frac{m_d - S \times m_w / 1000}{\rho_{ds}}}$$

426

427 Here,  $m_w$  represents mass lost after drying,  $\rho_w$  represents the density of pure  
428 water,  $m_d$  represents the mass of the dry sediment,  $S$  represents salinity in  $\text{g kg}^{-1}$ , and  $\rho_{ds}$   
429 represents the density of dry sediment (assumed to be  $2.5 \text{ g cm}^{-3}$ ). Porewater sulfate  
430 concentrations were measured using a Dionex Ion Chromatograph (Sunnyvale, CA) in  
431 porewater that was separated by centrifugation in 15 ml centrifuge tubes at  $5000 \times g$  for 5  
432 minutes, filtered at  $0.2 \mu\text{m}$ , and acidified with 10% HCl. Methane was measured using 3  
433 ml sediment subsamples that were collected from a cutoff syringe, entering through the  
434 side of a core section, immediately after core extrusion. Subsamples were deposited  
435 immediately in a 20 ml serum vial containing 1 ml, 0.1 M KOH. These were immediately  
436 stoppered and shaken to mix sediment with KOH. Methane was later measured by  
437 injecting 500  $\mu\text{l}$  of bottle headspace into a GC-FID (Agilent, Santa Clara, CA) using a  
438 headspace equilibrium method (Lapham *et al.*, 2008).

## 439 GEOCHEMICAL MODELING

440           Organic carbon remineralization rates as a function of depth were estimated by  
441 applying a multi-component reaction-transport model to depth distributions of sulfate and  
442 methane concentration. The model is based on equations described in Boudreau  
443 (Boudreau, 1996) and includes only sulfate reduction and methane production due to lack  
444 of data regarding oxic and suboxic processes. Thus, the model is limited to depths greater  
445 than 4.5 cm where sulfate reduction and methane production are the dominant processes,  
446 and bioirrigation and bioturbation may be assumed to be negligible. The organic matter  
447 remineralization rate is parameterized using the multi-*G* model first proposed by  
448 Jørgensen (1978); a two-component model was sufficient to accurately simulate the  
449 sulfate and methane data. For solutes, the upper boundary conditions were measured  
450 values at 4.5 cm while the lower boundary conditions (200 cm) were set to zero-gradient.  
451 The flux of reactive organic carbon to 4.5 cm was calculated from the sulfate flux across  
452 the 4.5 cm horizon and an estimate of methane burial below the lower boundary (the  
453 methane flux at the upper boundary was observed to be zero), with an assumed oxidation  
454 state of reactive carbon of -0.7. The model contains four adjustable parameters that are  
455 set to capture the major details of measured sulfate and methane data: first-order rate  
456 constants for both fractions of the reactive carbon pool; the partitioning factor for both  
457 fractions, and the rate constant for methane oxidation.

## 458 CELL ENUMERATION

459           Cells were enumerated by direct microscopic counts. One mL of sediment was  
460 placed in a 2-mL screw-cap tube with 500  $\mu$ l of 3% paraformaldehyde in phosphate

461 buffered saline (PBS), in which it was incubated overnight before being centrifuged for 5  
462 minutes at  $3000 \times g$ . The supernatant was removed and replaced with 500  $\mu$ l of PBS,  
463 vortexed briefly and centrifuged again at  $3000 \times g$ . The supernatant was subsequently  
464 removed and replaced with a 1:1 PBS:ethanol solution. Sediments were then sonicated at  
465 20% power for 40 seconds to disaggregate cells from sediments and diluted 40-fold into  
466 PBS prior to filtration onto a 0.2  $\mu$ m polycarbonate filter (Fisher Scientific, Waltham,  
467 MA) and mounted onto a slide. Cells were stained with 4',6-diamidino-2-phenylindole  
468 (DAPI) and enumerated by direct counts using a Leica Epifluorescence Microscope.

#### 469 METAGENOMIC ANALYSIS

470 To resolve the taxonomic distribution of extracellular peptidases we searched a  
471 pre-existing White Oak River *de novo* assembled and binned metagenomic dataset (Table  
472 S2; Baker *et al.*, 2015) for genes that were assigned extracellular peptidase functions.  
473 These assignments were based on best matches to extracellular peptidases in KEGG,  
474 pfam, and NCBI-nr (non-redundant) databases using the IMG annotation pipeline  
475 (Markowitz *et al.*, 2014). Genes were additionally screened for signal peptidase motifs  
476 using the following programs: PrediSI setting the organism group to gram-negative  
477 bacteria (Hiller *et al.*, 2004), PRED-Signal trained on archaea (Bagos *et al.*, 2009), the  
478 standalone version of PSORT v.3.0 trained against archaea (Yu *et al.*, 2010), and SignalP  
479 4.1 using gram-negative bacteria as the organism group (Petersen *et al.*, 2011). All  
480 programs were used with default settings if not stated otherwise. Binned genomes from  
481 three different depth zones of White Oak River sediments were examined. The sulfate-  
482 rich zone (SRZ) genomes were obtained from sites 2 and 3 core sections 8-12 and 8-10



483 cm, respectively. The sulfate-methane transitions zone (SMTZ) genomes were recovered  
484 from site 2 and 3 and depths of 30-32 cm and 24-28 cm. The methane-rich zone (MRZ)  
485 was from site 1 and 52-54 cm.

486

## 487 **Acknowledgements**

488           We thank Michael Piehler for access to his laboratory facilities at the University  
489 of North Carolina Institute of Marine Sciences, the captain of the R/V Capricorn for  
490 sampling assistance, and Terry Hazen for use of lab equipment at the University of  
491 Tennessee. We thank Oliver Jeffers for reminding ADS that science is cool. Funding for  
492 KHM was provided by NSF grant DBI-1156644 to Steven W. Wilhelm. Funding for  
493 ADS was provided by NSF grant OCE-1431598 and a C-DEBI subaward. This work is  
494 C-DEBI Contribution number <<to be determined.>>

495

## 496 **Conflict of interest**

497           The authors declare no competing financial interests in relation to the work  
498 described.

499

500

## 501 **References**

- 502 Allison SD. (2005). Cheaters, diffusion and nutrients constrain decomposition by  
503 microbial enzymes in spatially structured environments. *Ecol Lett* **8**: 626–635.
- 504 Arnosti C, Bell C, Moorhead DLL, Sinsabaugh RLL, Steen ADD, Stromberger  
505 M, *et al.* (2014). Extracellular enzymes in terrestrial, freshwater, and marine  
506 environments: perspectives on system variability and common research needs.  
507 *Biogeochemistry* **117**: 5–21.
- 508 Bada JL, Luyendyk BP, Maynard JB. (1970). Marine sediments: Dating by the  
509 racemization of amino acids. *Science (80- )* **170**: 730–732.
- 510 Bagos PG, Tsirigios KD, Plessas SK, Liakopoulos TD, Hamodrakas SJ. (2009).  
511 Prediction of signal peptides in archaea. *Protein Eng Des Sel* **22**: 27–35.
- 512 Baker BJ, Lazar CS, Teske AP, Dick GJ. (2015). Genomic resolution of linkages  
513 in carbon, nitrogen, and sulfur cycling among widespread estuary sediment bacteria.  
514 *Microbiome* **3**: 14.
- 515 Bell CW, Fricks BE, Rocca JD, Steinweg JM, McMahon SK, Wallenstein MD.  
516 (2013). High-throughput fluorometric measurement of potential soil extracellular enzyme  
517 activities. *J Vis Exp* e50961.
- 518 Bendtsen JD, Kiemer L, Fausbøll A, Brunak S. (2005). Non-classical protein  
519 secretion in bacteria. *BMC Microbiol* **5**: 58.
- 520 Benner R, Amon RMW. (2015). The size-reactivity continuum of major  
521 bioelements in the ocean. *Ann Rev Mar Sci* **7**: 185–205.
- 522 Benz R, Bauer K. (1988). Permeation of hydrophilic molecules through the outer

523 membrane of gram-negative bacteria. Review on bacterial porins. *Eur J Biochem* **176**: 1–  
524 19.

525 Biddle JF, Lipp JS, Lever MA, Lloyd KG, Sørensen KB, Anderson R, *et al.*  
526 (2006). Heterotrophic Archaea dominate sedimentary subsurface ecosystems off Peru.  
527 *Proc Natl Acad Sci U S A* **103**: 3846–51.

528 Bird JT, Tague E, Zinke L, Schmidt JM, Steen AD, Reese BK, *et al.* Uncultured  
529 microbial phyla suggest mechanisms for multi-thousand-year subsistence in Baltic Sea  
530 sediments. *MBio*.

531 Boudreau BP. (1996). A method-of-lines code for carbon and nutrient diagenesis  
532 in aquatic sediments. *Comput Geosci* **22**: 479–496.

533 Bradley JA, Amend JP, LaRowe DE. (2018). Survival of the fewest: Microbial  
534 dormancy and maintenance in marine sediments through deep time. *Geobiology*. e-pub  
535 ahead of print, doi: 10.1111/gbi.12313.

536 Breitbart M, Felts B, Kelley S, Mahaffy JM, Nulton J, Salamon P, *et al.* (2004).  
537 Diversity and population structure of a near-shore marine-sediment viral community.  
538 *Proc R Soc B Biol Sci* **271**: 565–574.

539 Carter DO, Yellowlees D, Tibbett M. (2007). Autoclaving kills soil microbes yet  
540 soil enzymes remain active. *Pedobiologia (Jena)* **51**: 295–299.

541 Coolen MJL, Cypionka H, Sass AM, Sass H, Overmann J. (2002). Ongoing  
542 modification of Mediterranean Pleistocene sapropels mediated by prokaryotes. *Science*  
543 **296**: 2407–10.

544 Coolen MJL, Overmann J. (2000). Functional Exoenzymes as Indicators of

545 Metabolically Active Bacteria in 124,000-Year-Old Sapropel Layers of the Eastern  
546 Mediterranean Sea. *Appl Environ Microbiol* **66**: 2589–2598.

547 Danovaro R, Dell’Anno A, Corinaldesi C, Magagnini M, Noble R, Tamburini C,  
548 *et al.* (2008). Major viral impact on the functioning of benthic deep-sea ecosystems.  
549 *Nature* **454**: 1084–1087.

550 Dauwe B, Middelburg JJ, Herman PMJ, Heip CHR. (1999). Linking diagenetic  
551 alteration of amino acids and bulk organic matter reactivity. *Limnol Oceanogr* **44**: 1809–  
552 1814.

553 Feng L, Yan H, Wu Z, Yan N, Wang Z, Jeffrey PD, *et al.* (2007). Structure of a  
554 site-2 protease family intramembrane metalloprotease. *Science* **318**: 1608–12.

555 Green DH, Cutting SM. (2000). Membrane topology of the *Bacillus subtilis* pro-  
556 sigma(K) processing complex. *J Bacteriol* **182**: 278–85.

557 Gruebel KA, Martens CS. (1984). Radon-222 tracing of sediment-water chemical  
558 transport in an estuarine sediment. *Limnol Oceanogr* **29**: 587–597.

559 Hiller K, Grote A, Scheer M, Münch R, Jahn D. (2004). PrediSi: Prediction of  
560 signal peptides and their cleavage positions. *Nucleic Acids Res* **32**. e-pub ahead of print,  
561 doi: 10.1093/nar/gkh378.

562 Hoehler TM, Jørgensen BB. (2013). Microbial life under extreme energy  
563 limitation. *Nat Rev Microbiol* **11**: 83–94.

564 Jacobson Meyers ME, Sylvan JB, Edwards KJ. (2014). Extracellular enzyme  
565 activity and microbial diversity measured on seafloor exposed basalts from Loihi  
566 seamount indicate the importance of basalts to global biogeochemical cycling. *Appl*

- 567 *Environ Microbiol* **80**: 4854–64.
- 568 Jørgensen BB. (1978). A comparison of methods for the quantification of  
569 bacterial sulfate reduction in coastal marine sediments: II. Calculation from mathematical  
570 models. *Geomicrobiol J* **1**: 29–47.
- 571 Jørgensen BB, Marshall IPG. (2016). Slow Microbial Life in the Seabed. *Ann Rev*  
572 *Mar Sci* **8**: 311–32.
- 573 Kelley CA, Martens CS, Chanton JPJP. (1990). Variations in sedimentary carbon  
574 remineralization rates in the White Oak River estuary, North Carolina. *Limnol Oceanogr*  
575 **35**: 372–383.
- 576 Kubo K, Lloyd KG, F Biddle J, Amann R, Teske A, Knittel K. (2012). Archaea of  
577 the Miscellaneous Crenarchaeotal Group are abundant, diverse and widespread in marine  
578 sediments. *ISME J* **6**: 1949–65.
- 579 Lapham LL, Chanton JP, Martens CS, Sleeper K, Woolsey JR. (2008). Microbial  
580 activity in surficial sediments overlying acoustic wipeout zones at a Gulf of Mexico cold  
581 seep. *Geochemistry, Geophys Geosystems* **9**: Q06001.
- 582 Lazar CS, Baker BJ, Seitz K, Hyde AS, Dick GJ, Hinrichs K-U, *et al.* (2016).  
583 Genomic evidence for distinct carbon substrate preferences and ecological niches of  
584 Bathyarchaeota in estuarine sediments. *Environ Microbiol* **18**: 1200–11.
- 585 Lloyd KG, Alperin MJ, Teske A. (2011). Environmental evidence for net methane  
586 production and oxidation in putative ANaerobic MEthanotrophic (ANME) archaea.  
587 *Environ Microbiol* **13**: 2548–2564.
- 588 Lloyd KG, Schreiber L, Petersen DG, Kjeldsen KU, Lever MA, Steen AD, *et al.*

589 (2013a). Predominant archaea in marine sediments degrade detrital proteins. *Nature* **496**:  
590 215–8.

591 Lloyd KG, Schreiber L, Petersen DG, Kjeldsen KU, Lever MA, Steen AD, *et al.*

592 (2013b). Predominant archaea in marine sediments degrade detrital proteins. *Nature* **496**.

593 e-pub ahead of print, doi: 10.1038/nature12033.

594 Lloyd KG, Steen AD, Ladau J, Yin J, Crosby L. (2018). Phylogenetically Novel

595 Uncultured Microbial Cells Dominate Earth Microbiomes Neufeld JD (ed). *mSystems* **3**:

596 e00055-18.

597 Lomstein BA, Langerhuus AT, D’Hondt S, Jørgensen BB, Spivack AJ. (2012).

598 Endospore abundance, microbial growth and necromass turnover in deep sub-seafloor

599 sediment. *Nature* **484**: 101–4.

600 Lomstein BA, Niggemann J, Jørgensen BB, Langerhuus AT. (2009).

601 Accumulation of prokaryotic remains during organic matter diagenesis in surface

602 sediments off Peru. *Limnology* **54**: 1139–1151.

603 Martens CS, Goldhaber MB. (1978). Early diagenesis in transitional sedimentary

604 environments of the White Oak River Estuary, North Carolina. *Limnol Oceanogr* **23**:

605 428–441.

606 Meng J, Xu J, Qin D, He Y, Xiao X, Wang F. (2014). Genetic and functional

607 properties of uncultivated MCG archaea assessed by metagenome and gene expression

608 analyses. *ISME J* **8**: 650–9.

609 Michalska K, Steen AD, Chhor G, Endres M, Webber AT, Bird J, *et al.* (2015).

610 New aminopeptidase from ‘microbial dark matter’ archaeon. *FASEB J* **29**: 4071–4079.

611 O’Sullivan LA, Roussel EG, Weightman AJ, Webster G, Hubert CR, Bell E, *et al.*  
612 (2015). Survival of Desulfotomaculum spores from estuarine sediments after serial  
613 autoclaving and high-temperature exposure. *ISME J* **9**: 922–933.

614 Obayashi Y, Suzuki S. (2005). Proteolytic enzymes in coastal surface seawater:  
615 Significant activity of endopeptidases and exopeptidases. *Limnol Oceanogr* **50**: 722–726.

616 Orsi WD, Edgcomb VP, Christman GD, Biddle JF. (2013). Gene expression in  
617 the deep biosphere. *Nature* **499**: 205–208.

618 Orsi WD, Richards TA, Francis WR. (2018). Predicted microbial secretomes and  
619 their target substrates in marine sediment. *Nat Microbiol* **3**: 32–37.

620 Pantoja S, Lee C, Marecek JF. (1997). Hydrolysis of peptides in seawater and  
621 sediment. *Mar Chem* **57**: 25–40.

622 Petersen TN, Brunak S, von Heijne G, Nielsen H. (2011). SignalP 4.0:  
623 discriminating signal peptides from transmembrane regions. *Nat Methods* **8**: 785–6.

624 Rawlings ND, Barrett AJ, Thomas PD, Huang X, Bateman A, Finn RD. (2018).  
625 The MEROPS database of proteolytic enzymes, their substrates and inhibitors in 2017  
626 and a comparison with peptidases in the PANTHER database. *Nucleic Acids Res* **46**:  
627 D624–D632.

628 Reintjes G, Arnosti C, Fuchs BM, Amann R. (2017). An alternative  
629 polysaccharide uptake mechanism of marine bacteria. *ISME J* **11**: 1640–1650.

630 Schimel JP, Weintraub MN. (2003). The implications of exoenzyme activity on  
631 microbial carbon and nitrogen limitation in soil: a theoretical model. *Soil Biol Biochem*  
632 **35**: 549–563.



- 633 Schmidt J. (2016). Microbial Extracellular Enzymes in Marine Sediments:  
634 Methods Development and Potential Activities in the Baltic Sea Deep Biosphere.  
635 University of Tennessee - Knoxville.
- 636 Starnawski P, Bataillon T, Ettema TJG, Jochum LM, Schreiber L, Chen X, *et al.*  
637 (2017). Microbial community assembly and evolution in subseafloor sediment. *Proc Natl*  
638 *Acad Sci U S A* **114**: 2940–2945.
- 639 Steen AD, Arnosti C. (2013). Extracellular peptidase and carbohydrate hydrolase  
640 activities in an Arctic fjord (Smeerenburgfjord, Svalbard. *Aquat Microb Ecol* **69**: 93–99.
- 641 Steen AD, Arnosti C. (2011). Long lifetimes of  $\beta$ -glucosidase, leucine  
642 aminopeptidase, and phosphatase in Arctic seawater. *Mar Chem* **123**: 127–132.
- 643 Steen AD, Vazin JPJP, Hagen SMSM, Mulligan KHKH, Wilhelm SWSW.  
644 (2015). Substrate specificity of aquatic extracellular peptidases assessed by competitive  
645 inhibition assays using synthetic substrates. *Aquat Microb Ecol* **75**: 271–281.
- 646 Stursova M, Sinsabaugh RL. (2008). Stabilization of oxidative enzymes in desert  
647 soil may limit organic matter accumulation. *Soil Biol Biochem* **40**: 550–553.
- 648 Vetter YA, Deming JW. (1994). Extracellular enzyme activity in the Arctic  
649 Northeast Water polynya. *Mar Ecol Prog Ser* **114**: 23–34.
- 650 Vetter YAY, Deming JJW, Jumars PPA, Krieger-Brockett BBB. (1998). A  
651 Predictive Model of Bacterial Foraging by Means of Freely Released Extracellular  
652 Enzymes. *Microb Ecol* **36**: 75–92.
- 653 Yeats C, Bentley S, Bateman A. (2003). New knowledge from old: in silico  
654 discovery of novel protein domains in *Streptomyces coelicolor*. *BMC Microbiol* **3**: 3.

655 Yu NY, Wagner JR, Laird MR, Melli G, Rey S, Lo R, *et al.* (2010). PSORTb 3.0:  
656 improved protein subcellular localization prediction with refined localization  
657 subcategories and predictive capabilities for all prokaryotes. *Bioinformatics* **26**: 1608–  
658 1615.

659 Zhou Z, Liu Y, Lloyd KG, Pan J, Yang Y, Gu J-D, *et al.* (2018a). Genomic and  
660 transcriptomic insights into the ecology and metabolism of benthic archaeal  
661 cosmopolitan, Thermoprofundales (MBG-D archaea). *ISME J* 1.

662 Zhou Z, Pan J, Wang F, Gu J-D, Li M. (2018b). Bathyarchaeota: globally  
663 distributed metabolic generalists in anoxic environments. *FEMS Microbiol Rev* **42**: 639–  
664 655.

665

666

667 **Table**

668 Table 1: Substrates used in this study and the enzymes that hydrolyze them. AMC stands  
669 for aminomethylcoumarin, the moiety that becomes fluorescent after hydrolysis of the  
670 peptide bond. All amino acids are in the L- stereoconformation unless otherwise noted.  
671 Enzymes are described as “putative” because the substrate specificity of many  
672 environmental peptidases is fairly broad, so multiple peptidases may hydrolyze any given  
673 substrate.

| Substrate                                                        | Abbreviation | Putative enzyme                      |
|------------------------------------------------------------------|--------------|--------------------------------------|
| L-arginine-7-amido-4-methylcoumarin                              | Arg-AMC      | arginyl aminopeptidase               |
| L-glycine-7-amido-4-methylcoumarin                               | Gly-AMC      | glycyl aminopeptidase                |
| L-leucine-7-amido-4-methylcoumarin                               | Leu-AMC      | leucyl aminopeptidase                |
| Carboxybenzoyl-glycine-glycine-arginine-7-amido-4-methylcoumarin | Z-GGR-AMC    | gingipain and other endopeptidases   |
| Alanine-alanine-phenylalanine-7-amido-4-methylcoumarine          | AAF-AMC      | clostripain and other endopeptidases |
| Boc-valine-proline-arginine-AMC                                  | Boc-VPR-AMC  | gingipain and other endopeptidases   |
| D-phenylalanine-AMC                                              | D-Phe-AMC    | D-phenylalanine aminopeptidase       |
| L-phenylalanine-AMC                                              | L-Phe-AMC    | L-phenylalanine-aminopeptidase       |
| Ornithine-AMC                                                    | Orn-AMC      | ornithine aminopeptidase             |

674

675

## 676 Figures and Legends

677 Figure 1: Saturation curves for six substrates measured using the single-cuvette reader  
678 methodology at each of six depths. Dark circles indicate “live” samples, open triangles  
679 indicate autoclaved controls. Lines indicate nonlinear least-squares fits to the Michaelis-  
680 Menten rate law. Substrate abbreviations are given in the column headings and are  
681 defined in Table 1. Sediment depths are listed on row headings in centimeters below  
682 sediment-water interface.

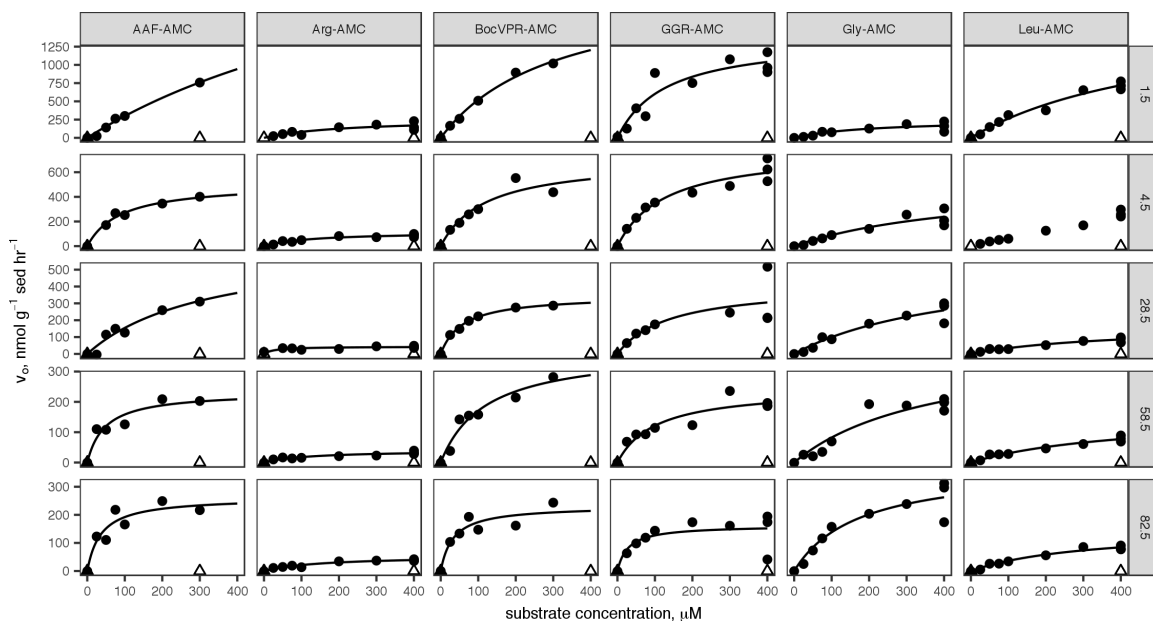

683

684

685 Figure 2: a.) The sum of all peptidase  $V_{max}$  values, relative to the value at 4.5 cm, versus  
686 sediment depth. Error bars represent propagated error of the estimate of  $V_{max}$  for each  
687 substrate. b.) Summed  $V_{max}$  relative to cell count. Error bars represent propagated error  
688 from summed  $V_{max}$  and cell counts, and is dominated by cell count uncertainty. c.)  
689 Organic carbon oxidation rates modeled from sulfate and methane profiles. d.) Summed  
690  $V_{max}$  relative to modeled carbon oxidation rates. Error bars represent error in summed  
691  $V_{max}$  relative to organic carbon oxidation rates, for which uncertainty was not modeled.

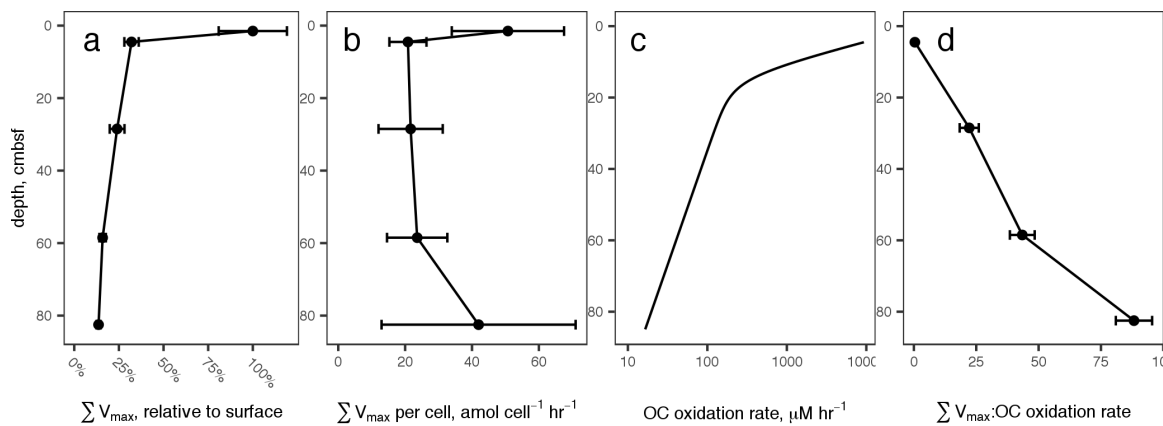

692

693

694

695 Fig 3: a.) Ratio of  $v_0$  for D-phenylalanine aminopeptidase: L-phenylalanine  
696 aminopeptidase and b.) L-ornithine aminopeptidase : L-phenylalanine aminopeptidase.

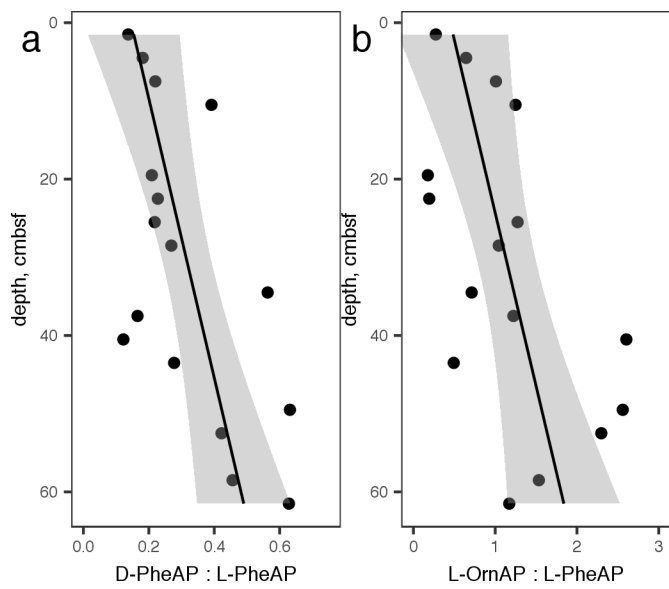

697

698

699 Fig 4:  $K_m$  values of extracellular peptidases as a function of depth. Details of substrates  
700 and the peptidases they correspond to are in Table 1.

701

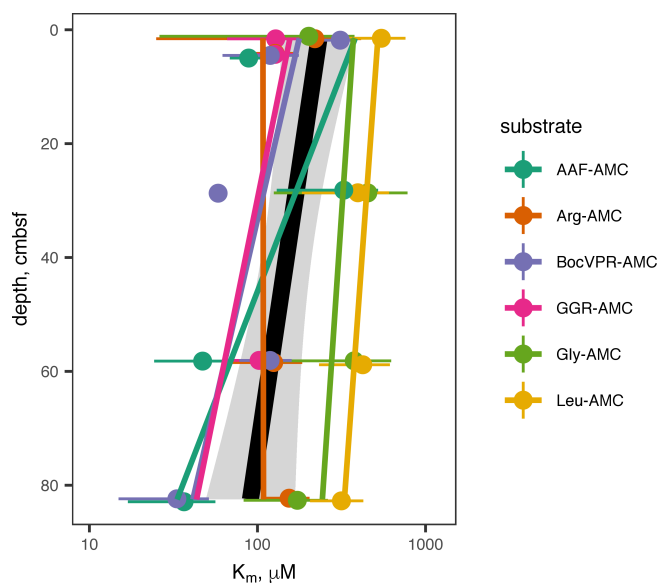

702

703

704

705

706

707 Fig 5: Frequency of reads for genes of various classes of extracellular peptidases that  
 708 were associated with signal peptidases, relative to all genes for extracellular peptidases at  
 709 that depth. SRZ, SMTZ, and MRZ correspond to “sulfate reducing zone” (8-12 cmbsf),  
 710 “sulfate-methane transition zone” (24-32 cmbsf) and “methane-rich zone” (24-28 cmbsf)  
 711 respectively.

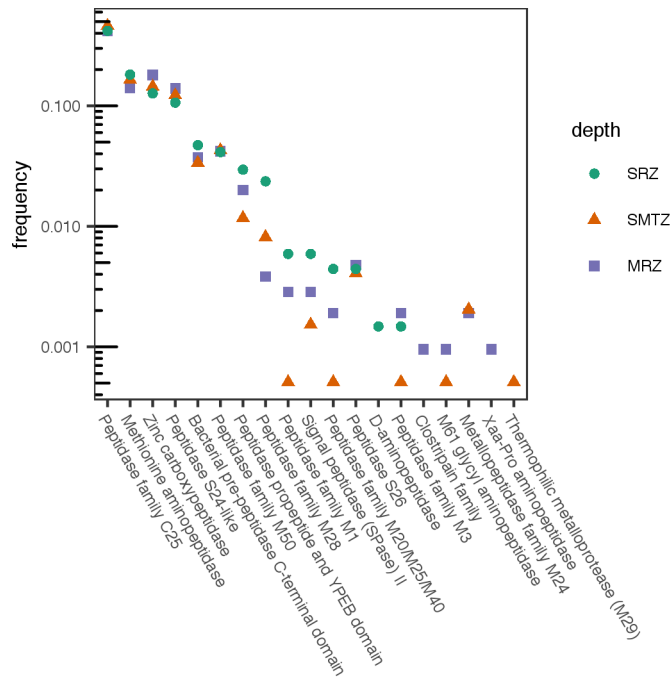

712

713

714



## 715 Supplemental Information

716 Fig S1:  $V_{max}$  and  $K_m$  values.

717

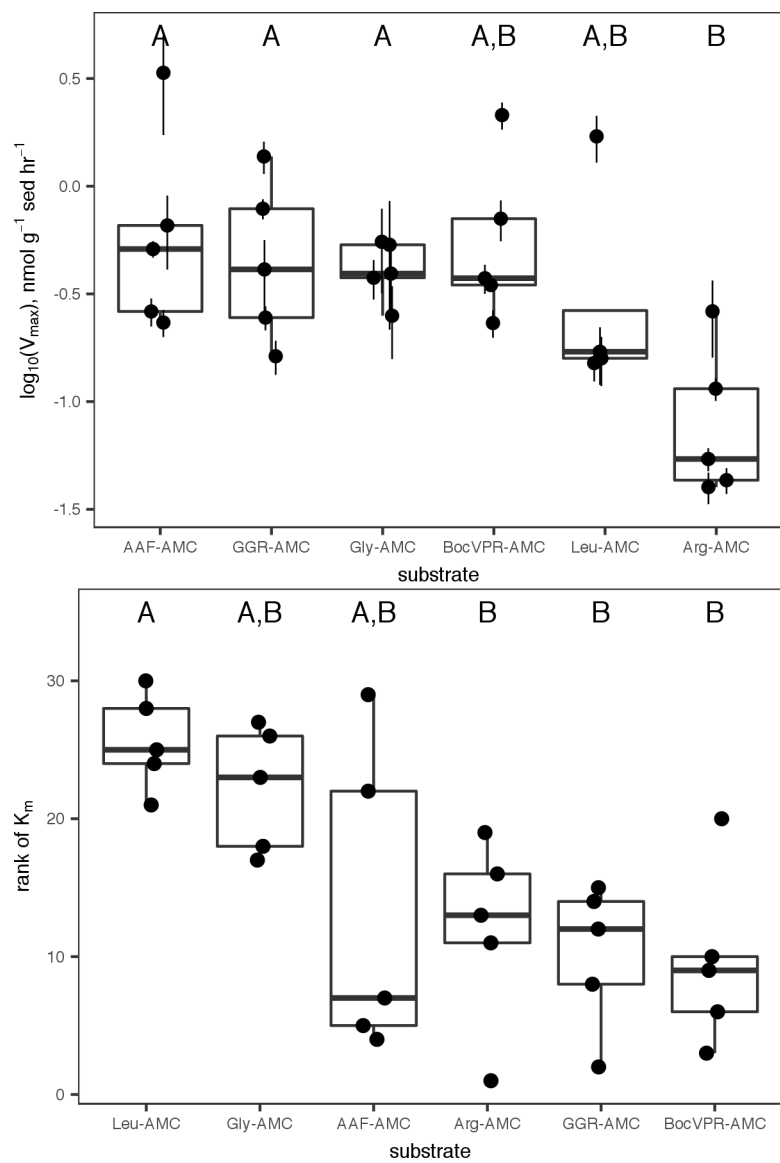

718

719

720 Supplemental file: annotations of all peptidases included in this manuscript.

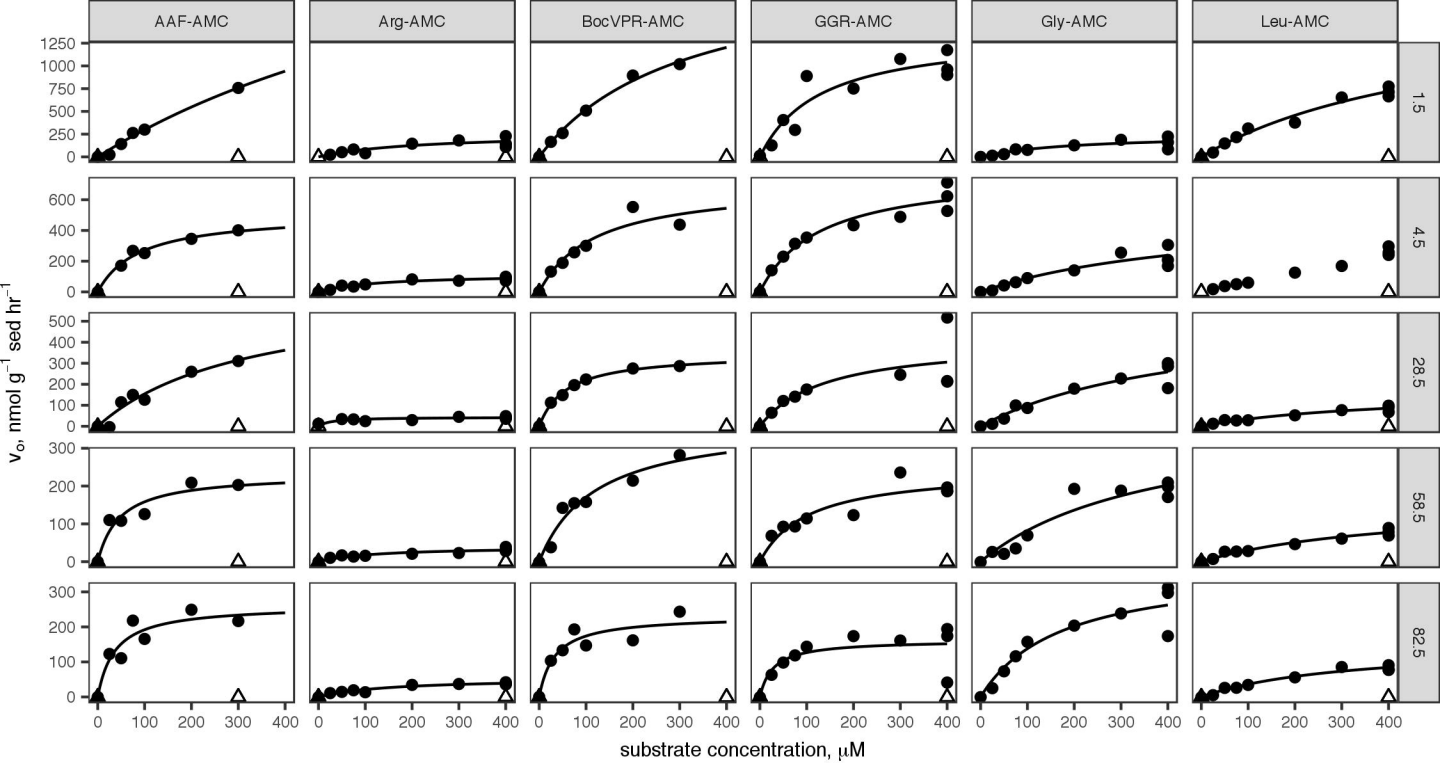

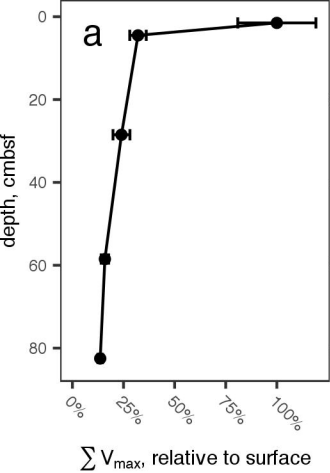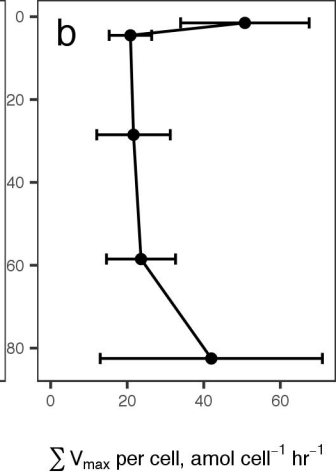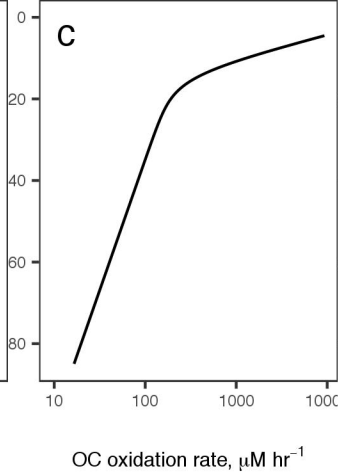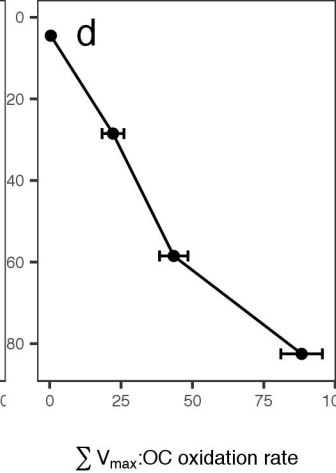

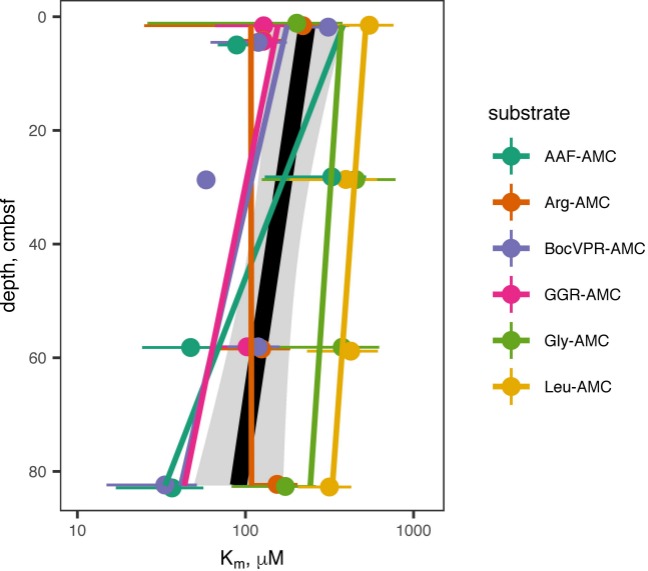

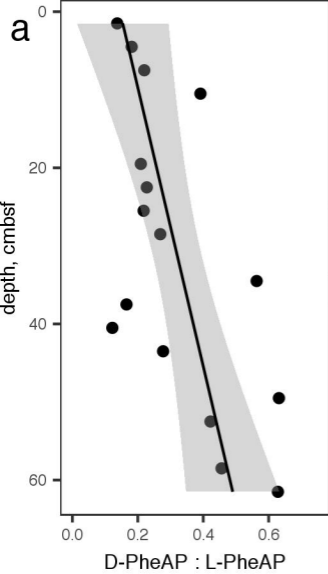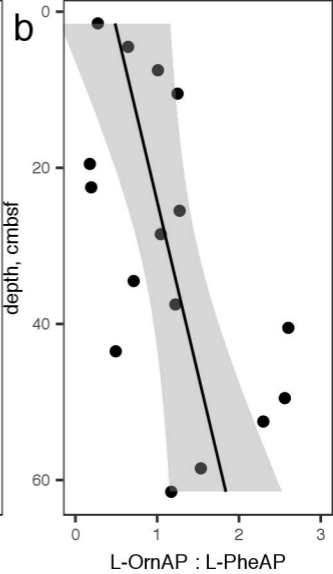

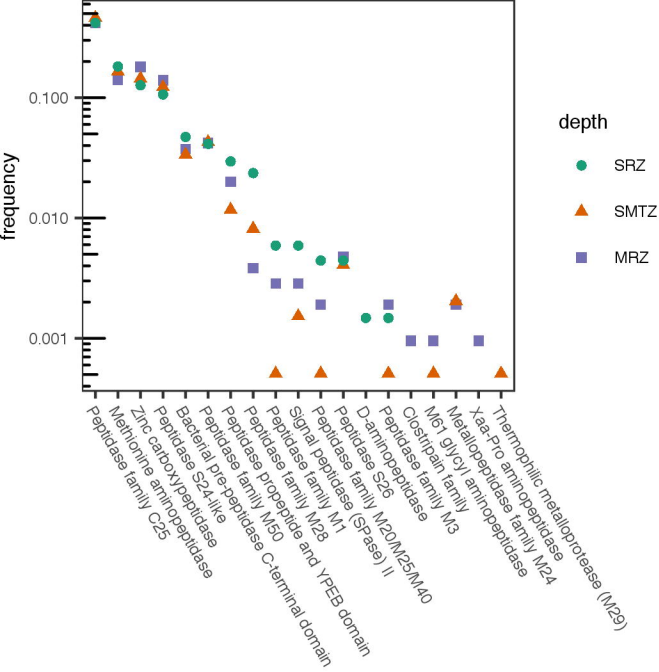

Source: https://www.biorxiv.org/content/10.1101/080671v3.full.pdf
