# Supplementary material for: Kinetics and identities of extracellular peptidases in subsurface sediments of the White Oak River Estuary, NC
Source: bioRxiv or medRxiv preprint supplement (doi:10.1101/080671), 2019-07-15
Supplement: Supplementary file [file 080671-1.pdf]

|                                    | PrediSI called SPs (%) |       |       | PredSignal called SPs (%) |       |       | PSC  |
|------------------------------------|------------------------|-------|-------|---------------------------|-------|-------|------|
|                                    | MRZ                    | SMTZ  | SRZ   | MRZ                       | SMTZ  | SRZ   |      |
| Zinc carboxypeptidase              | 56.77                  | 43.3  | 43.82 | 60.94                     | 48.45 | 51.69 | 0.52 |
| Peptidase family C25               | 44.16                  | 42.96 | 37.02 | 54.76                     | 57.55 | 60.55 | 7.14 |
| Clostripain family                 | 48.75                  | 49.12 | 33.33 | 46.25                     | 51.75 | 28.57 | 12.5 |
| Peptidase family M1                | 33.33                  | 50    | 25    | 0                         | 50    | 0     | 0    |
| Signal peptidase (SPase) II        | 33.33                  | 71.43 | 0     | 16.67                     | 42.86 | 0     | 0    |
| Peptidase family M28               | 25                     | 5.56  | 25    | 25                        | 5.56  | 18.75 | 0    |
| Peptidase S24-like                 | 21.19                  | 17.21 | 17.57 | 15.89                     | 16.8  | 12.16 | 0    |
| Peptidase family M50               | 16.36                  | 13.39 | 12.12 | 7.27                      | 8.93  | 9.09  | 0    |
| Metallopeptidase family M24        | 0                      | 33.33 | 0     | 0                         | 16.67 | 0     | 0    |
| Peptidase family M20/M25/M40       | 0                      | 0     | 33.33 | 0                         | 0     | 0     | 0    |
| M61 glycyI aminopeptidase          | 33.33                  | 0     | 0     | 0                         | 0     | 0     | 0    |
| Methionine aminopeptidase          | 0.68                   | 0.31  | 1.63  | 0                         | 0     | 1.63  | 0    |
| D-aminopeptidase                   | 0                      | 0     | 0     | 0                         | 0     | 0     | 0    |
| Peptidase family M3                | 0                      | 0     | 0     | 0                         | 0     | 0     | 0    |
| Peptidase S26                      | 0                      | 0     | 0     | 0                         | 0     | 0     | 0    |
| Thermophilic metalloprotease (M29) | 0                      | 0     | 0     | 0                         | 0     | 0     | 0    |
| Xaa-Pro aminopeptidase             | 0                      | 0     | 0     | 0                         | 0     | 0     | 0    |
